# 1 Comprehensive PAM prediction for CRISPR-Cas 2 systems reveals evidence for spacer sharing, preferred 3 strand targeting and conserved links with CRISPR 4 repeats

5 Jochem NA Vink<sup>1,2</sup>, Jan HL Baijens<sup>1,2</sup> and Stan JJ Brouns<sup>1,2</sup>

6 <sup>1</sup> Department of Bionanoscience, Delft University of Technology, Delft, Netherlands

7 <sup>2</sup> Kavli Institute of Nanoscience, Delft, Netherlands

## 8 Abstract

9 The adaptive CRISPR-Cas immune system stores sequences from past invaders as spacers in CRISPR  
10 arrays and thereby provides direct evidence that links invaders to hosts. Mapping CRISPR spacers has  
11 revealed many aspects of CRISPR biology, including target requirements such as the protospacer  
12 adjacent motif (PAM). However, studies have so far been limited by a low number of mapped spacers  
13 in the database. By using vast metagenomic sequence databases, we mapped one third (~70,000) of more  
14 than 200,000 unique CRISPR spacers from a variety of microbes, and derived a catalog of more than  
15 one hundred unique PAM sequences associated with specific CRISPR subtypes. These PAMs were  
16 further used to correctly assign the orientation of CRISPR arrays, revealing conserved patterns between  
17 the last nucleotides of the CRISPR repeat and PAM. From the curated CRISPR arrays dataset we could  
18 also deduce CRISPR subtype specific preferences for targeting either template or coding strand of open  
19 reading frames. While some DNA-targeting systems (e.g. Type I-E and Type II systems) prefer the  
20 template strand and avoid mRNA, other DNA- and RNA-targeting systems (i.e. Type I-A, I-B and Type  
21 III systems) prefer the coding strand and mRNA. In addition, we found large scale evidence that both  
22 CRISPR adaptation machinery and CRISPR arrays are shared between different CRISPR-Cas systems.

23 This could lead to simultaneous DNA- and RNA targeting of invaders, which may be effective at  
24 combating mobile genetic invaders.

## 25 Introduction

26 CRISPR, an adaptive immune system provides heritable defence in the form of spacers, which are short  
27 nucleic acid sequences (28-36 bp) obtained from previous encounters with mobile genetic elements  
28 (MGE). These are stored in the bacterial or archaeal chromosome in CRISPR arrays (Jackson et al.,  
29 2017). CRISPR arrays contain spacers flanked on both sides by repeat sequences (~30 bp) and are  
30 transcribed as a single RNA, and subsequently processed into multiple crRNAs. crRNAs can be loaded  
31 into effector complexes formed by Cas proteins, that subsequently scan the cell for nucleic acid targets.  
32 Base pairing between the spacer and target nucleic acids (protospacer) allows the specific binding of  
33 effector complexes to targets, which are then destroyed (Brouns et al., 2008; Marraffini, 2015). CRISPR-  
34 Cas systems are widespread in bacteria and archaea, with 42% of bacterial and 85% of archaeal genomes  
35 containing a CRISPR system (Makarova et al., 2020).

36 Both acquisition of new spacers (CRISPR adaptation) and target inactivation (CRISPR interference) are  
37 carried out by specialized sets of Cas proteins. *Cas* genes likely have originated from Casposons  
38 (Krupovic et al., 2014), a family of self-replicating transposons, and have since evolved many new genes  
39 and gene variants (Makarova et al., 2020). Based on the evolutionary classification of their *cas* genes,  
40 there are two classes of CRISPR-Cas systems. Class I systems contain crRNA-effector complexes made  
41 up of multiple subunits, while effector complexes of Class II systems are encoded by a single *cas* gene  
42 (Makarova et al., 2020). The two classes are further divided into six types, where each type is further  
43 divided into subtypes. The different types and subtypes do not occur homogeneously in nature, with  
44 Class II systems being nearly exclusive to bacteria (Makarova et al., 2020). More than 95% of CRISPR  
45 systems found in complete genomes are one of the first three types: Type I, II or III (Pourcel et al.,  
46 2020).

47 CRISPR systems can be studied on a mechanistic or on a functional level. Mechanistic features describe  
48 how CRISPR systems are able to fulfil their role. The mechanisms through which CRISPR systems

49 operate are diverse. For example, some CRISPR systems defend the cell by targeting DNA (e.g. Type  
50 I, II, IV and V), whereas other CRISPR types target invader RNA (e.g. Type III and VI) (Makarova et  
51 al., 2020). Another important mechanistic feature is the presence of a protospacer adjacent motif (PAM),  
52 which DNA-targeting systems require to differentiate self from non-self (Gleditsch et al., 2019; Hale  
53 et al., 2009; Mojica et al., 2009). Furthermore, the PAM is an important feature in the target search  
54 process of DNA-targeting systems within the cell (Vink et al., 2020; Xue et al., 2017). This motif  
55 sequence flanking the crRNA-pairing site, between one and five nucleotides long, not only differs  
56 between subtypes, but can also differ between *cas* gene orthologs within the same subtype, for example  
57 Cas9 variants (Gasiunas et al., 2020).

58 Functional features describe what purposes CRISPR systems fulfil within the cell. There is evidence for  
59 some CRISPR functioning beyond adaptive immunity (Westra et al., 2014), however even within the  
60 context of an adaptive immune system, CRISPR systems can serve different roles (e.g. as a first line of  
61 defence, or as an activator of other immune system pathways). This can be a reason why 23% of  
62 genomes with CRISPR systems contain more than one subtype (Bernheim et al., 2020), in spite of their  
63 costs (Nobrega et al., 2020; Vale et al., 2015). There are preferred combinations of certain subtypes,  
64 suggesting that there is an added benefit of having a specific combination of different subtypes present  
65 in the cell. The added benefit might consist of cooperativity between systems by formation of different  
66 lines of defence, avoidance of type-specific CRISPR inhibition by MGE or coupling of abortive  
67 infections mechanisms (Bernheim et al., 2020; Hoikkala et al., 2021; Pawluk et al., 2017; Silas et al.,  
68 2017). On the other hand, some CRISPR systems are specialized to protect from certain invaders, which  
69 may require multiple co-occurring systems to be present in a single genome to protect from different  
70 types of invaders. Type IV systems that co-occur together with Type I systems primarily target plasmids  
71 (Pinilla-Redondo et al., 2020) and Type III systems have been shown to be able to target a class of  
72 phages that other Type I and V systems cannot (Malone et al., 2020; S. D. Mendoza et al., 2020),  
73 indicating that specialization in targets is a potential reason for co-occurrence of different subtypes.  
74 Through cooperation and specialization, co-occurring subtypes can function complementary.

75 The functional and mechanistic features described above have been demonstrated experimentally for  
76 several microbial model systems, and these are often of specific interest to applications such as genome-  
77 editing. High-throughput assays to identify the PAM of CRISPR systems have been developed, but  
78 remain laborious (Gasiunas et al., 2020; Walton et al., 2021). The full diversity of PAM and other  
79 mechanistic and functional features of CRISPR-Cas systems in nature remain understudied. To improve  
80 our knowledge on mechanistic and functional features of single and co-occurring CRISPR systems  
81 beyond the model organisms, we relied on vast metagenomic sequence databases to computationally  
82 find targets for spacers from diverse bacteria and archaea. We mapped a third of the unique spacers to a  
83 target in publicly available metagenome sequence databases. We used the flanking regions of found  
84 spacer targets to build an initial PAM catalog of more than a hundred unique PAMs, and for more than  
85 half of the spacers in CRISPRCasDB (Pourcel et al., 2020). This was then employed to assign the correct  
86 orientation of transcription of CRISPR arrays, giving access to target strand information of invaders,  
87 further improving PAM predictions, and uncovering conserved links between repeat ends and PAM.  
88 Through the quantification of the spacers targeting template or coding strands we found that the  
89 preference for one of these strands is subtype specific, and indicates that some DNA-targeting systems  
90 (Type I-E, Type II-A and Type II-C) avoid RNA while other DNA- and RNA-targeting systems  
91 preferentially target RNA (Type I-A, Type I-B and Type III systems). We found spacers in co-occurring  
92 CRISPR systems to be compatible with both PAM and strand requirements, indicating that they may be  
93 shared between systems and will lead to both DNA and RNA targeting. Lastly, we identified three  
94 categories of multi-effector compatible spacers, which meet the PAM and strand requirements of co-  
95 occurring DNA and RNA-targeting systems.

## 96 Results

### 97 Blast analysis finds matches for 32% of spacers from CRISPRCasDb

98 The first step in our analysis was to select a set of CRISPR spacers and find potential matches to these  
99 sequences in DNA sequence databases. To this end, we selected the previously described  
100 CRISPRCasDB, which contained all spacers from 4266 complete bacterial and archaeal genomes

101 (Pourcel et al., 2020). The spacers from CRISPRCasDB were then mapped to sequences from the NCBI  
102 nucleotide database as well as metagenomic databases with high number of prokaryotic or their virus  
103 sequences. Matches between spacers and sequences from the databases were found using BLASTn  
104 (Altschul et al., 1990). The matches were then filtered using an optimized approach which increased the  
105 number of matches while keeping the false positives to a minimum (Methods, Supplementary figure  
106 1A). As indication of the false positive rate, we determined that for the matches found in NCBI  
107 nucleotide database 1% were eukaryotic or eukaryotic virus sequences, with 10% of matches in  
108 prokaryotic viral sequences and the majority (88%) corresponding to prokaryotic genome sequences  
109 (Supplementary figure 1A). This specificity towards prokaryotic sequences in a database that contains  
110 predominantly (83%) eukaryotic sequences shows that even though false positive hits cannot be  
111 excluded, the false positive rate is low.

112 From the 221,850 total unique spacers analysed, this optimized filtering approach resulted in 72,099  
113 spacers (32% of total) with at least one match (Figure 1A), of which 31,327 spacers (15% of total) had  
114 a match in the NCBI nucleotide database (Figure 1B). The fraction of spacers with matches differed  
115 greatly between different genera, with *Streptococcus*, *Pseudomonas* and *Staphylococcus* among the  
116 genera with the highest fraction of matches (77%, 69% and 64% respectively) and *Calothrix*, *Nostoc*  
117 and *Thermosipho* among the lowest (4%, 4% and 3% respectively) (Figure 1C). Genera with high spacer  
118 matches typically occurred in well-sampled environments (human-associated), whereas the genera with  
119 lower matches occurred in what appear to be poorly sampled environments (soil, oceanic). A previous  
120 study (Shmakov et al., 2017) which looked for spacer matches in the NCBI nucleotide database found  
121 matches for 7% of spacers, using a more stringent 95% sequence identity and 95% coverage cut off as  
122 filtering thresholds. This difference in the fraction of spacers with matches in the NCBI nucleotide  
123 database indicates the added benefit and importance of our more sensitive filtering process.  
124 Additionally, the number of sequences in the database has increased in recent years from ~230 billion  
125 to ~700 billion bases. The most important factor for the increase in the number of spacers with matches  
126 however was the use of metagenomic databases, as the majority of unique spacer matches derived from  
127 these databases (Figure 1B, Supplementary Figure 1B).

128 To find the subtypes of the spacers, we aligned the CRISPR repeat sequences to repeat sequences with  
129 known subtypes, based on the method described by Bernheim et al., 2020. With the exception of subtype  
130 II-B for which we extracted 453 spacers, all analysed subtypes from Type I, II and III systems contained  
131 more than a thousand spacers (Figure 1D). An exceptionally high fraction of spacers with matches was  
132 found for subtypes II-A (63%) and II-C (53%), while subtype I-A, subtype I-D, and Type III subtypes  
133 had notably lower fractions of spacer matches than average (15%, 11% and 20% respectively). The  
134 differences in fractions of matches found between subtypes may be due to their phylogenetic  
135 distributions, where well-sampled genera have different subtypes than poorly sampled genera (see  
136 above). However, even within well-sampled genera the fraction of spacers with matches differs between  
137 subtypes, with Type III subtypes having fewer hits on average (22%) than other subtypes (38%). Overall,  
138 the large number of spacers with matches revealed sets of sequences that were targeted by each CRISPR-  
139 Cas subtype, which were then used to study mechanistic and functional aspects of CRISPR defence.

140 Alignment of protospacer flanks reveals 114 unique subtype-specific PAMs covering  
141 55% of spacers

142 One of the important mechanistic features of CRISPR defence for DNA targeting systems (type I, II, IV  
143 and VI) is PAM recognition (Deveau et al., 2008; Mojica et al., 2009; Shah et al., 2013). The first PAM  
144 was discovered in the alignment of bacteriophage sequences that were targeted by *Streptococcus* spacers  
145 (Bolotin et al., 2005). Later studies revealed more PAMs or the effect of mutant versions of the PAM  
146 (Anders et al., 2014; Fischer et al., 2012; Leenay et al., 2016; Musharova et al., 2019). We expand on  
147 these known PAMs that are limited to well-studied organisms by predicting new PAMs based on the  
148 alignment of the flanks of spacer matches (protospacers). The potential of this method for large scale  
149 PAM predictions was shown in a previous bioinformatics study (Mendoza & Trinh, 2018), with a key  
150 limiting factor being the number of spacers with matching targets. It was also previously shown that  
151 PAMs, acquisition machinery and repeat clusters co-evolve (Shah et al., 2013). We therefore increased  
152 the number of spacers with matches within one group by clustering spacers based on repeat similarity  
153 (>90% nucleotide identity and same repeat length). The sensitivity of PAM detection depends on the  
154 information content of the nucleotide positions of the PAM (signal) compared to the information content

155 of the other flanking positions (noise). We found that clustering based on repeat similarity increased  
156 signal to noise ratio for PAM detection compared to clustering based on species-subtype (e.g.  
157 *Escherichia coli* I-E) or genus-subtype (e.g. *Pseudomonas* I-F). We furthermore found that spacers  
158 originating from organisms with very high or low GC-contents, displayed increased noise. We thus  
159 further increased the signal to noise ratio by adjusting the expected frequency of flanking nucleotides  
160 based on the average GC-content of the spacers within the cluster (Supplementary Figure 2). The flanks  
161 of unique hits within each cluster can subsequently be aligned, and with enough spacer hits, the  
162 information content reliably reveals the PAM sequence and position relative to the protospacer (Figure  
163 2).

164 This clustering approach together with our large number of hits led to a PAM prediction for 123,144  
165 spacers (55% of all spacers; Supplementary File 1 and 2). For Type I and Type IV the PAM is known  
166 to occur in the 5' (upstream) flank of the protospacer, while Type II systems have their PAM in the 3'  
167 (downstream) flank of the protospacer (Jackson et al., 2017) (Figure 2A). This well characterized feature  
168 of the PAM therefore allows the unique possibility to correctly orient CRISPR arrays given the rules  
169 described above. To measure the accuracy of CRISPR array orientation predictions, we compared  
170 predictions to experimentally determined orientations from a recent study using transcriptome  
171 sequencing (TOP) to determine the direction of transcription of arrays (Houenoussi et al., 2020). The  
172 7968 experimentally inferred spacer orientations were the same as our predictions in 85% of cases, while  
173 only 33% of TOP predicted spacer orientations were the same as the CRISPRCasDb prediction  
174 (Supplementary data). We furthermore found that many Type I and Type III repeats for which we  
175 predicted the orientation based on the PAM, contained the 3'-end motif ATTGAAAC of their repeat  
176 (Supplementary Figure 3) described previously (Lange et al., 2013). This conserved motif is transcribed  
177 and forms the 5' handle of the crRNA and is held by crRNA-effector complexes. Altogether, these  
178 findings indicate that the position of the PAM is a reliable indicator for the orientation of the CRISPR  
179 array, and can be used to annotate CRISPR array information, giving access to features such as spacer  
180 acquisition chronology and strandedness.

## 181 Type I PAMs are shorter and closer to the protospacer than Type II PAMs

182 Sequence logos of alignments of Type I (Figure 2A) recover previously known PAMs including the  
183 subtype I-E AWG PAM found in *Escherichia* and subtype I-F CC PAM found in *Pseudomonas* (Leenay  
184 & Beisel, 2017), but also many previously undescribed PAMs. They are generally short (2-3 nt) and are  
185 well defined (high information content/bit score). For Type II PAMs, we found both short, well defined  
186 PAM motifs (such as *Streptococcus* II-A) as well as longer PAMs with less conserved PAM motifs  
187 (Figure 2B). Poorly conserved PAM motifs could be caused by a variation of PAMs used within the  
188 same repeat cluster or by the promiscuity of PAM recognition in Type II systems (Crawley et al., 2018).  
189 Additionally, many Type II PAMs consisted of multiple consecutive nucleotides of the same kind in a  
190 row, such as NAAAA (*Capnocytophaga* II-C). A low nucleotide conservation and repetitive nucleotide  
191 identity of a sequence motif can be caused by ambiguity in PAM distance to the protospacer, as this  
192 ambiguity will spread the nucleotide conservation over a larger range of positions from the protospacer.  
193 PAMs were found with the closest conserved nucleotide ranging 2 to 5 nucleotides away from the  
194 protospacer. The first nucleotide position on the 3' end of the protospacer was always found to be an N  
195 for Type II PAMs. For a minority of subtype II-A and subtype II-C repeat clusters, a distinct lack of  
196 PAM was found (Supplementary figure 4B). As some Cas9 proteins from subtypes II-A and II-C can  
197 target RNA independently from a PAM sequence (Strutt et al., 2018), this RNA targeting could  
198 contribute to natural PAM-less variants that may inspire engineered PAM-less variants (Walton et al.,  
199 2020). Alternatively, PAM usage might be highly variable in these specific repeat clusters and could  
200 therefore obscure distinct PAM motifs. Overall, we found 114 unique PAMs (PAM-subtype  
201 combinations; Supplementary Data File 1), of which 43 PAMs in Type I systems (Supplementary Table  
202 1), with each subtype containing at least two different PAMs and subtype I-B containing 12 different  
203 PAMs.

## 204 43% of Type III repeat clusters contain a PAM

205 Like the PAM-less Type II variants, some Type III repeat clusters were devoid of a PAM. This is  
206 expected, as RNA-targeting systems do not require a PAM to find a target (Figure 2C, Supplementary  
207 Figure 4), and rely on the Protospacer Flanking Sequence (PFS) to avoid self targeting (Deng et al.,



208 2013; Elmore et al., 2016). Interestingly, other repeat clusters contained PAMs that appeared to be the  
209 same as Type I PAMs, which raised the question, why these clusters contained a PAM. We compared  
210 the PAM detection frequency for clusters with at least 25 unique spacer hits (Figure 2D). For Type I  
211 subtypes and subtype II-A, the majority of repeat clusters have a defined PAM, whereas for Type II-C  
212 and Type III systems the number of PAM-containing repeat clusters was lower, with Type III-A having  
213 the lowest (16%) and III-B the highest (56%) fraction of PAM-containing repeat clusters in Type III  
214 systems. As it was previously shown that Type III systems often lack their own acquisition machinery  
215 (Makarova et al., 2015), we hypothesized that the PAM found in Type III repeat clusters originates from  
216 the spacer acquisition machinery that Type I systems share with Type III systems. We observed that the  
217 PAM frequency in Type III clusters that lack their own acquisition machinery is high (95%; Figure 2E),  
218 whereas the PAM frequency is low in Type III clusters that contain their own *cas1-cas2* genes (8%).  
219 This supports the hypothesis that the PAM in Type III arrays originates from Type I spacer acquisition  
220 modules functioning in *trans*.

## 221 Conserved patterns between PAM and repeats

222 PAMs usually differ from the ends of CRISPR repeats, which allows for self-nonsel self discrimination  
223 (Leenay et al., 2016; Mojica et al., 2009; Westra et al., 2013). Type III and other RNA-targeting CRISPR  
224 systems do not require a PAM, but many do require mismatching between the repeat end and the  
225 protospacer flanking sequence (PFS) (Johnson et al., 2019; Marraffini & Sontheimer, 2010). Given these  
226 previous observations, we wanted to investigate if there are conserved links between repeat ends and  
227 PAM of individual systems (Figure 3A), and whether Type III PAMs that originate from Type I spacer  
228 acquisition modules are also compatible with Type III PFS requirements.

229 We collected all unique repeat-PAM sequence combinations in our dataset and compared the repeat  
230 nucleotide with the corresponding PAM nucleotide in each position. For Type I systems (Figure 3B) we  
231 found that the -3 and -2 nucleotide of the repeat can be a strong predictor of the corresponding PAM  
232 nucleotide, where a -3C in the repeat would lead to a -3A in the PAM, -3G to -3T, -3T to -3A. At the  
233 middle position a -2C would lead to a -2A in the PAM. (Figure 3B). The most common -2 and -3 repeat

234 nucleotide is an A, in which case the PAM nucleotide mostly is either a T or a C. For the -1 position,  
235 the nucleotide identity of the PAM sequence cannot be predicted directly from the repeat sequence.

236 For Type II systems, most nucleotide positions can accommodate two or three PAM nucleotides  
237 (Supplementary Figure 5A). In +2 and +3 positions, the most common repeat nucleotide (T),  
238 accommodates either an A or G PAM nucleotide, which is analogous to the most common nucleotide in  
239 Type I systems (-3 and -2 adenine), which tends to co-occur with a C or T PAM nucleotide. For Type  
240 III systems, the variation of repeat nucleotides is smaller, but generally similar combinations are found  
241 as in Type I systems (Supplementary Figure 5B). Overall, the most conserved repeat-PAM co-  
242 occurrence patterns are found in the -2 and -3 positions of the Type I and Type III arrays.

243 These co-occurrence patterns suggest that in most cases the PAM that is used and selected for differs  
244 from the repeat. However previous studies have shown that in some cases, part of the repeat sequence  
245 is PAM -derived (Swarts et al., 2012). We then asked in what CRISPR subtypes the PAM matches the  
246 corresponding repeat nucleotide for each of the spacer flanking positions. When we counted the  
247 occurrence of a matching PAM, we found that this only occurred frequently in the -1 position of Type  
248 I-C (35%) and Type I-E (48%; Figure 3C). We found that these matches are associated with repeats that  
249 have TTC PAMs in Type I-C and AAG PAMs in Type I-E, which could indicate that the C of Type I-  
250 C repeat sequences is PAM-derived, as was similarly demonstrated for the G of AAG PAMs in Type I-  
251 E (Swarts et al., 2012).

252 In other positions and CRISPR types, >98% of the repeat-PAM combinations did not match each other,  
253 which shows that the general patterns between repeats and PAMs, and perhaps mechanism of self- vs  
254 nonself discrimination is conserved in all subtypes. In Type III systems all cases demonstrate  
255 mismatches between PAM and repeat, which is a requirement of functional Type III spacers (Johnson  
256 et al., 2019; Marraffini & Sontheimer, 2010). This finding demonstrates that the PAMs of Type III array  
257 spacers acquired with Type I acquisition modules are compatible with PFS requirements of Type III  
258 systems.

259

260 Strand bias for the template or coding strand is subtype specific

261 Our method has revealed a large number of newly identified PAMs and has shown that Type III systems  
262 which lack their own acquisition machinery and co-occur with Type I systems, almost always contain a  
263 PAM. The presence of a PAM in these systems could enable Type I systems to use the spacers stored in  
264 Type III arrays as they are compatible with the PAM requirements of Type I effector complexes.  
265 Furthermore Type III effector complexes could benefit from a PAM-selecting acquisition module, as it  
266 excludes spacers with repeat-PAM matches (Figure 3C).

267 Besides the PFS, another requirement for type III spacers is that the spacer comes from the correct  
268 strand, as these complexes can only bind to the RNA transcripts. We wondered whether some species  
269 indeed use Type I and III dual functionality CRISPR arrays, as PAM-dependent DNA targeting and  
270 PAM-independent mRNA targeting are not mutually exclusive. We therefore asked whether spacers of  
271 DNA-targeting systems are also compatible with Type III surveillance complexes, if they happened to  
272 be picked from the correct strand.

273 To determine the potential ability of crRNA to target RNA, we measured the strand bias by counting  
274 the spacers that targeted the coding or template strand of predicted open reading frames (ORFs) (Figure  
275 4A). As spacers targeting the template strand are unable to base pair the transcribed RNA, the fraction  
276 of spacers targeting the coding strand serves as an estimate of the RNA targeting ability of the crRNA.  
277 For example, in *Moraxella* IIIB arrays, a significant bias for the coding strand was found (88%,  $p < e^{-11}$ )  
278 (Figure 4B). This bias allows Type III effectors carrying crRNA from those spacers to bind to their  
279 target RNA. However, also I-C spacers in *Moraxella*, for whose effectors this is not strictly required,  
280 show significant bias for the coding strand ( $p < e^{-3}$ ), indicating a selection for RNA-targeting spacers.

281 For *Escherichia* subtype I-E, 977 spacer matches inside ORFs were found, of which 611 (63%) targeted  
282 the template strand (Figure 4C), showing a significant bias for targeting the template strand ( $p < e^{-14}$ )  
283 potentially avoiding RNA. No significant strand bias was found for *Escherichia* subtype I-F (43%  
284 template strand,  $p=0.11$ ), suggesting that strand bias is CRISPR subtype specific.

285 Analysis of our complete dataset revealed general trends in the strand preferences for each subtype  
286 (Figure 4D, E). The strongest strand bias was found in Type III systems with an average of 65% of the  
287 spacers matching the coding strand (coding strand:template strand ~ 2:1). This result demonstrates that  
288 there is selection in Type III systems for spacers to target the transcribed RNA. This selection can  
289 originate at the adaptation stage by dedicated adaptation machinery selecting from RNA/coding strands  
290 such as RT-Cas1 (Silas et al., 2016) or at the interference stage, where only functional RNA-targeting  
291 spacers are retained in the population (Artamonova et al., 2020). The strand biases we found are  
292 consistent with our curated CRISPR array orientation predictions, because an incorrect CRISPR array  
293 orientation prediction would obscure strand specific targeting. Type I-A and Type I-B also displayed  
294 significant strand bias for the coding strand although at lower levels (60% and 55%;  $p < e^{-9}$  and  $p < e^{-14}$   
295 respectively).

296 Contrary to the Type III, Type I-A and I-B systems, we found a significant strand bias towards the  
297 template strand in in subtype I-E, Type IV and Type II systems, with the strongest bias found in subtype  
298 II-A (59%) and subtype I-E (57%). Given the high number of spacers in these groups the chance of  
299 observing this bias by chance is small ( $p < e^{-23}$  and  $p < e^{-69}$  respectively), again suggesting avoidance of  
300 RNA.

### 301 Co-occurrence of Type I and Type III systems lead to PAM and strand targeting 302 compatibility

303 As we noticed that Type III spacers were compatible with Type I PAMs in multiple cases, we next asked  
304 whether Type I spacers are compatible with RNA targeting in microbes with co-occurring Type I and  
305 III systems. We measured the strand bias of Type I spacers in genomes containing either combination  
306 of Type I, Type II and Type III surveillance complexes (Figure 4F). No significant strand bias was found  
307 for Type I spacers in the presence of Type I and/or Type II surveillance complexes. However, in the  
308 presence of Type I and Type III surveillance complexes, Type I spacers had a slight but significant  
309 coding strand bias (55%,  $p < e^{-14}$ ). This might be caused by increased selection pressure to keep RNA  
310 targeting spacers in the presence of RNA targeting surveillance complexes. This would suggest that  
311 spacers are selected to be compatible for both Type I and Type III effector complexes in such situations.

312 For Type II spacers, the presence of Type III did not significantly change the strand bias (Figure 4G).  
313 Given the natural tendency of Type II spacers to bias towards the template strand (Figure 4E), these  
314 findings suggest that Type II spacers are less compatible with co-occurring Type III effector complexes  
315 than Type I spacers.

316 Three distinct categories of co-occurring multi-effector compatible arrays exist  
317 The findings above indicate that subtype specific preferences exist for either the template or coding  
318 strand of the DNA. These preferences might enable or preclude compatibility between the spacers of  
319 co-occurring subtypes. We categorised all multi-effector compatible arrays that can be used by effector  
320 complexes from different subtypes. This means for co-occurring DNA-targeting systems these arrays  
321 need to have a PAM that can be used in both systems, whereas for co-occurrence of a DNA- target  
322 CRISPR-Cas system with an RNA targeting system, the arrays present in the genome need to both have  
323 the correct PAM and have a bias for the coding strand.

324 Overall, we can distinguish three main categories of co-occurring CRISPR-Cas systems in which spacers  
325 are compatible for multiple effectors (Figure 5A, Supplementary File 3).

326 The first category, exemplified by *Paenibacillus larvae* SAG 10367, consists of two co-occurring DNA-  
327 targeting systems which have their own adaptation machinery and their own repeat sequences. This is  
328 the smallest category and has been found in seven genomes (Figure 5A, B; Type I-A-Type I-B: 5, Type  
329 I-B-Type I-C: 2). We furthermore found 45 genomes of *Listeria*, which contain a Type I-B system and  
330 a Type II-A system from which the spacers have PAMs that might be compatible with both I-B and II-  
331 A effector complexes if the arrays are transcribed bi-directionally (CCN and NGG).

332 The second category, exemplified by *Clostridium botulinum* MAP 5, consists of a co-occurring DNA-  
333 targeting and RNA-targeting, with distinct repeat sequences but a commonly shared acquisition  
334 machinery (Figure 5A, C). We have only found evidence for multi-effector compatibility in co-occurring  
335 Type I and Type III systems. The Type I array in this category has a strand bias which indicates that the  
336 Type III effector complexes can use these spacers whereas the Type III arrays have the same PAM  
337 sequence as the Type I arrays allowing the Type I effector complexes to use these spacers. This category

338 has been found in 17 genomes, mostly containing a Type I-B and a Type III system but also two genomes  
339 were found with a Type I-E and a Type III system.

340 The third category, exemplified by *Sulfolobus acidocaldarius* SUSAZ, consists of a co-occurring DNA-  
341 targeting and RNA-targeting system, with shared repeat sequences and shared acquisition machinery  
342 (Figure 5A, D). In this category the single repeat cluster present has a PAM and coding strand bias. This  
343 is the most common category of multi-effector compatible arrays which we detected in 85 genomes. It  
344 consists of co-occurring Type III systems with either a Type I-B (82%) but also Type I-A (13%) and  
345 Type I-C (5%).

346 Taken together, our data indicate that multi-effector compatible arrays are most prevalent between Type  
347 I and Type III systems. Within the Type I systems, the most common subtype to use multi-effector  
348 compatible arrays is Type I-B, but also Type I-A, Type I-C and Type I-E use these arrays. The Type III  
349 systems that use compatible arrays lack their own adaptation machinery, however repeat clusters in these  
350 co-occurring systems display a strand bias that suggests selection for RNA-targeting spacers. The  
351 information content is similarly strong for PAMs in Type III arrays as in Type I arrays, which  
352 demonstrates that the PAM is equally strong selected for Type I as shared Type III arrays.

## 353 Discussion

354 In this study we have matched CRISPR spacers of complete genomes of bacteria and archaea with their  
355 targets in (meta)genome databases and subsequently analysed the genomic flanks of the protospacers.  
356 We computationally found targets for 32% of CRISPR spacers from thousands of bacterial and archaeal  
357 genomes. This is a major increase in spacer targets compared to previous studies and is due to our  
358 sensitive filtering process and use of metagenomic databases (Shmakov et al., 2017). We found that  
359 Type III spacers had the highest fraction of unknown targets of any CRISPR type. This was not solely  
360 caused by the phylogenetic or environmental occurrence of Type III systems, because the fraction of  
361 Type III spacers with unknown targets within a genus was typically higher than that of other types. This  
362 means that the targets of Type III systems are either under sampled, or that Type III spacers contain  
363 more mismatches to their targets, making them harder to find computationally. Recently, a single new

364 study doubled the number of known RNA viruses including phages (Wolf et al., 2020), while another  
365 study greatly increased the number of known single-stranded RNA phages (Callanan et al., 2020),  
366 indicating that RNA phages have been poorly sampled. We predict the fraction of spacers with matches  
367 to increase with increasing numbers of available metagenomic data, especially including more RNA  
368 viruses and more data from poorly sampled environments.

369 By analysing the flanks of the spacer hits in great depth, we have generated a vast catalog of PAM  
370 sequences for each CRISPR repeat cluster. The repeat sequence is a good predictor of parts of the PAM  
371 sequence, and outperformed clustering based on genus-subtype classifications. This finding is  
372 corroborated by the position-wise comparison of PAM and repeat nucleotides, which shows certain  
373 repeat nucleotides predict PAM nucleotides. This may be helpful to either predict the PAM from scratch,  
374 or to further experimentally determine the PAM while reducing the degeneracy at certain positions,  
375 limiting the predicted PAM sequence space. The mismatch between repeat and PAM nucleotides  
376 generally holds, except for the Type I-E and Type I-C, where for some repeat clusters the repeat  
377 nucleotide matches the PAM at the -1 position. The most common PAMs of these systems (TTC for I-  
378 C; AAG for I-E) are also complementary to each other. These findings indicate Type I-C systems could  
379 have a similar mechanism of spacer acquisition with a PAM-derived last repeat nucleotide as in Type I-  
380 E (Swarts et al., 2012), even though these systems do not share related Cas1 proteins (Makarova et al.,  
381 2011) or repeat structures (Lange et al., 2013).

382 The PAM catalog can be used to predict the PAM for arrays in newly sequenced genomes and  
383 metagenomic contigs if they contain repeats that are closely related to the repeats in our database, which  
384 gives access to unexplored mechanistic and biotechnological potential. For repeats that are not in our  
385 database, the nucleotide identities of the repeat in the spacer flanking positions can be used to predict,  
386 with lesser certainty, which PAM it could have and select certain CRISPR systems of interest for further  
387 study.

388 Furthermore, the position of the PAM in the target is a reliable indicator for the orientation of  
389 transcription of CRISPR arrays. Correct prediction of transcription of CRISPR arrays gives access to  
390 measuring chronology of invader encounters and strand specific targeting of CRISPR-Cas systems,

391 which is especially relevant for RNA targeting CRISPR. The spacers of Type III systems, which target  
392 RNA, have a bias towards targeting coding strands, making them capable of base pairing and thereby  
393 targeting RNA. Unexpectedly we also found several subtypes with a preference for the template strand  
394 (I-E and Type II). The reason for this type of strand bias is not yet clear, but we pose that this could be  
395 caused by a selection for spacers that do not target RNA (RNA avoidance), as DNA-targeting with these  
396 spacers might be impacted by inactivating complementary RNA (Jore et al., 2011). In addition, there  
397 might be a difference in binding or dislodging of crRNA effector complexes from the template strand  
398 vs coding strand by RNA polymerase (Clarke et al., 2018; Vink et al., 2020).

399 We have categorized multi-effector compatible CRISPR arrays whether they share the same repeats  
400 and/or acquisition machinery and whether only DNA, or both DNA and RNA are targeted. DNA-  
401 targeting systems that use multi-effector compatible arrays generally have their own acquisition  
402 machinery and the low frequency of this co-occurrence in nature might indicate that this is not actively  
403 selected for. It needs to be experimentally verified whether the spacers in these compatible arrays are  
404 actually shared between complexes. However, some crRNA sharing between DNA systems has already  
405 been observed experimentally, so it's therefore likely to be found for more systems (Majumdar et al.,  
406 2015).

407 Multi-effector compatible arrays are much more common in co-occurring DNA- and RNA-targeting  
408 systems and the strand bias that occurs in Type I arrays indicates that Type III effector complexes are  
409 using these spacers and thereby creating selection pressure on the RNA binding potential of the  
410 transcribed crRNA. It also seems that the most commonly co-occurring Type I systems (I-A, I-B and I-  
411 C) that use compatible arrays, also have the largest coding strand bias. Whether this strand bias is  
412 induced by the presence of Type III or whether these subtypes by their nature have a strand preference  
413 and therefore became more commonly compatible with Type III systems is not yet clear. Interestingly,  
414 many of the subtype combinations that share PAMs also co-occur more often than expected by chance,  
415 suggesting they have positive epistatic interactions (Bernheim et al., 2020). Furthermore, repeat  
416 sequences of type I-A and I-B are in same repeat families with Type III repeats, providing further  
417 indications of their compatibility (Lange et al., 2013).



418 The experimentally determined spacer sharing in *Marinomonas mediterranea* (Silas et al., 2017)  
419 described previously does not fall within the categories in this study as the Type III system has its own  
420 adaptation machinery. In this case, the systems are not mutually compatible because the Type I systems  
421 cannot use the Type III spacers due to a lack of PAM, which we have not further investigated in this  
422 study. Also the other previously experimentally described spacer sharing systems in *Pyrococcus*  
423 (Majumdar et al., 2015) and *Flavobacterium* (Hoikkala et al., 2021) were not found due to a lack of  
424 sufficient hits, which demonstrates that these bio-informatic analysis likely underestimate the number  
425 of systems that can cooperate.

426 The discovery of multi-effector spacer compatibility in a large number of genomes in this study together  
427 with previous experimental evidence of spacer sharing of RNA and DNA-targeting systems (Deng et  
428 al., 2013; Majumdar et al., 2015; Silas et al., 2017) shows that there is selection pressure to share spacers  
429 cooperatively within arrays. The evolutionary benefits of such cooperativity could be profound. Firstly,  
430 as two subtypes generally have different mismatch tolerance (Anderson et al., 2015; Fineran et al., 2014;  
431 Manica et al., 2013), targeting the same sequence with two subtypes can reduce the probability of escape  
432 mutation. Secondly a combination of an RNA and DNA targeting systems can provide multiple layers  
433 of defence, where RNA-targeting might give more time for DNA-targeting systems to destroy the  
434 invader before the cell is taken over (Vink et al., 2020). Thirdly the length of arrays in a genome has  
435 recently been shown to be limited by auto-immunity (H. Chen et al., 2021). By sharing spacers, each  
436 subtype is supplied with a maximum diversity of spacers while self-targeting costs are minimized. Lastly  
437 the different mechanisms these systems use allows for complementary and distinct benefits. The priming  
438 mechanism (Datsenko et al., 2012; Nicholson et al., 2019), unique to DNA targeting systems can  
439 accelerate spacer acquisition for both systems, whereas cOA signaling pathways (Kazlauskiene et al.,  
440 2017; Niewoehner et al., 2017), unique to Type III, could activate defence systems that benefit both  
441 systems.

442 Altogether this study highlights the wealth of information that can be retrieved by analysing the targets  
443 of CRISPR spacers on a large scale. It furthermore demonstrates under what conditions CRISPR-Cas

444 systems can cooperate and provides a large catalog of PAM predictions and targeted MGEs awaiting  
445 further study.

## 446 Materials and Methods

### 447 CRISPR spacers and sequence data

448 221 089 spacers along with information on *cas* gene presence, genome and repeat sequence were  
449 obtained from CRISPRCasDb (Pourcel et al., 2020) in February 2020 and the taxonomy of the genomes  
450 was obtained from NCBI Taxonomy database (Federhen, 2012). We created our own sequence database  
451 by combining all sequences from the NCBI nucleotide database (Benson et al., 2018; Pruitt et al., 2005),  
452 environmental nucleotide database (Sayers et al., 2009), PHASTER (Arndt et al., 2016), Mgnify  
453 (Mitchell et al., 2020) , IMG/M (I. M. A. Chen et al., 2017), IMG/Vr (Paez-Espino et al., 2019),  
454 HuVirDb (Soto-Perez et al., 2019), HMP database (Peterson et al., 2009), and data from Pasolli et al.,  
455 2019. All databases were accessed in February 2020.

456 Subtypes were predicted based on the repeat sequences using the subtype predictions and method  
457 described by Bernheim et al., 2020, where the subtype of a spacer was inferred by the similarity of its  
458 repeat sequence to repeat sequences with known subtype (74% identity threshold to infer subtype).

### 459 Blast hits and filtering

460 Hits between spacers and sequences from the aforementioned databases were obtained using the  
461 command line blastn program (Altschul et al., 1990) version 2.10.0, which was run with parameters  
462 word\_size 10, gapopen 10, penalty 1 and an e-value cutoff of 1, to find as many potential targets as  
463 possible. These blast hits were then filtered to remove hits of spacers inside CRISPR arrays and false  
464 positive hits found by chance. Hits inside CRISPR arrays were detected by aligning the repeat sequence  
465 of the spacer to the flanking regions of the spacer hit (23 nucleotides on both sides). This alignment was  
466 done using the globalxs function from the Biopython pairwise2 package (Cock et al., 2009) with -3 gap  
467 open and -3 gap extend parameters. If more than 13 nucleotides were identical in the alignment of at  
468 least one flank, the hit was suspected to fall inside a CRISPR array and was filtered out.

469 To minimize the number of hits found by chance, we filtered hits based on the fraction of spacer  
470 nucleotides that hit the target sequence, as this metric considers both the sequence identity and the  
471 coverage of the spacer by the blast hit. In a first step, only hits with this fraction higher than 90% were  
472 kept. To find targets for even more spacers while keeping the number of false positives low, we included  
473 a second step where hits with a fraction higher than 80% were kept if another spacer from the same  
474 genus hit the same contig or genome in the first step. This second step did not introduce hits on any new  
475 contigs or genomes and was based on the assumption that multiple spacers from the same genus hitting  
476 the same contig or genome is unlikely to be caused by chance. Finally, we removed spacers that were  
477 shorter than 27 nucleotides (54 spacers) and removed 7 spacers that were hitting aspecifically, such as  
478 inside ribosomal RNAs or tRNAs. This left 72,099 unique spacers with target hits for downstream  
479 analysis.

#### 480 Protospacer flank alignment for orientation and PAM predictions

481 The PAM is known to occur on the 5' end of the protospacer for Type I, Type IV and V CRISPR-Cas  
482 systems, and on the 3' end for Type II systems (Collias & Beisel, 2021; Jackson et al., 2017). We used  
483 this property to predict the orientation of transcription of CRISPR arrays and sequence of crRNA. The  
484 PAM sides were compared to the nucleotide conservation in the flanking regions of the spacer hits and  
485 the spacer orientations were predicted such that the flank with the greater conservation matched the  
486 known PAM side.

487 To measure the nucleotide conservation in the flanking regions, data from multiple spacers was  
488 combined based on the subtype and repeat sequences of the spacers. Highly similar repeat sequences  
489 from the same subtype were clustered using CD-HIT (Fu et al., 2012) with a 90% identity threshold.  
490 We hypothesized that similar repeat sequences would be used in a similar orientation and would utilize  
491 the same PAM sequences, as coevolution of PAM, repeat and Cas1 and Cas2 sequences has been shown  
492 previously (Alkhnbashi et al., 2014; Lange et al., 2013). For each repeat cluster the flanking regions of  
493 the spacer hits were aligned. To equally weigh each spacer within the repeat cluster, irrespective of the  
494 number of blast hits, consensus flanks were obtained per spacer. These consensus flanks contained the  
495 most frequent nucleotide per position of the flanking regions. From the alignment of consensus flanks

496 the nucleotide conservation, or information content, in each flank was calculated in bitscore (Schneider  
497 & Stephens, 1990) using the Sequence logo python package. We corrected for GC-content of the  
498 targeted sequences by calculating the expected occurrences of each nucleotide based on the GC-content  
499 of the spacer sequences. To minimize the number of orientation predictions based on little or noisy data,  
500 we only predicted the orientation for repeat clusters when the alignment of consensus flanks consisted  
501 of at least 10 unique protospacers. Furthermore, the information content of at least two positions was  
502 higher than 0.3 bitscore and higher than 5 times the median bitscore calculated from 23-nt flanks on  
503 both sides. These parameters were chosen as strictly as possible, while still yielding orientation  
504 predictions for the highest number of spacers.

505 Using the orientation predictions described above, we predicted the PAMs for each repeat cluster by  
506 checking which nucleotide positions were conserved. To minimize PAM predictions based on noise, we  
507 only predicted the PAM for repeat clusters where the alignment of consensus flanks consisted of at least  
508 10 unique protospacers. A nucleotide position was predicted to be part of the PAM when higher than  
509 0.5 bitscore and higher than 10 times the median bitscore. These parameters were chosen as strictly as  
510 possible, while maximizing the number of repeat clusters with PAM predictions and minimizing the  
511 number of unique PAMs predicted.

512 We subsequently categorized and counted multi-effector compatible spacers in the following ways.  
513 Firstly by an occurrence of multiple repeat clusters with different subtype classification that both  
514 contained the same PAM, for two DNA targeting clusters (category I) or a DNA and a RNA targeting  
515 cluster (category II). Secondly if multiple *cas* gene clusters from different subtypes were in the vicinity  
516 of a single repeat cluster and their genomes did not further contain other arrays linked to these *cas* gene  
517 clusters they were counted as a third category multi-effector compatible array.

518

## 519 Coding versus template strand targeting analysis

520 For each spacer target inside an open reading frame (ORF), we determined if the spacer targets the  
521 coding (DNA and RNA) or template strand (DNA-only) during transcription. The ORFs and its

522 orientation were predicted using Prodigal (Hyatt et al., 2010) for one target sequence per spacer. The  
523 target sequence of each spacer was selected as the longest hit sequence in the NCBI nucleotide database,  
524 excluding ‘other sequences’, or, if no such sequence was hit, the longest hit sequence in metagenomics  
525 database. Using our spacer orientation predictions for Type I, II and IV spacers, and the orientation  
526 predictions from CRISPRCasDb for the other spacers, we checked if the spacer target (blast hit  
527 orientation) was on the coding or template strand of the predicted ORF. To test for significant bias  
528 towards either the temperate or the coding strand, a two-sided tailed binomial test was performed with  
529 an expected probability of 0.5.

530

531

## 532 Data and Material availability

533 The datasets on which the analysis is based have been submitted as Supplementary Files. Scripts to  
534 reproduce figures are available on request.

535

## 536 Acknowledgements

537 The authors thank Christine Pourcel and Pierre-Albert Charbit for supplying the CRISPRCasDB in a  
538 spacer-based format and all members of the Brouns groups for input during group discussions. S.B. is  
539 supported by a Vici grant of the Netherlands Organisation for Scientific Research (VI.C.182.027;  
540 NWO).

541

## 542 Author contributions

543 S.B. and J.V. conceived and supervised the project; J.V. gathered databases; J.V. and J.B. wrote  
544 analysis scripts; J.V., J.B. and S.B. wrote the manuscript.

545

546 Declaration of Interests

547 The authors declare no competing financial interests.

548

549 Literature cited

550 Alkhnbashi, O. S., Costa, F., Shah, S. A., Garrett, R. A., Saunders, S. J., & Backofen, R. (2014). CRISPRstrand:

551 Predicting repeat orientations to determine the crRNA-encoding strand at CRISPR loci. *Bioinformatics*.

552 <https://doi.org/10.1093/bioinformatics/btu459>

553 Altschul, S. F., Gish, W., Miller, W., Myers, E. W., & Lipman, D. J. (1990). Basic local alignment search tool.

554 *Journal of Molecular Biology*. [https://doi.org/10.1016/S0022-2836\(05\)80360-2](https://doi.org/10.1016/S0022-2836(05)80360-2)

555 Anders, C., Niewoehner, O., Duerst, A., & Jinek, M. (2014). Structural basis of PAM-dependent target DNA

556 recognition by the Cas9 endonuclease. *Nature*, *513*(7519), 569–573.

557 <https://doi.org/10.1038/nature13579>

558 Anderson, E. M., Haupt, A., Schiel, J. A., Chou, E., Machado, H. B., Strezoska, Ž., Lenger, S., McClelland, S.,

559 Birmingham, A., Vermeulen, A., & Smith, A. V. B. (2015). Systematic analysis of CRISPR-Cas9 mismatch

560 tolerance reveals low levels of off-target activity. *Journal of Biotechnology*.

561 <https://doi.org/10.1016/j.jbiotec.2015.06.427>

562 Arndt, D., Grant, J. R., Marcu, A., Sajed, T., Pon, A., Liang, Y., & Wishart, D. S. (2016). PHASTER: a better, faster

563 version of the PHAST phage search tool. *Nucleic Acids Research*. <https://doi.org/10.1093/nar/gkw387>

564 Artamonova, D., Karneyeva, K., Medvedeva, S., Klimuk, E., Kolesnik, M., Yasinskaya, A., Samolygo, A., &

565 Severinov, K. (2020). Spacer acquisition by Type III CRISPR–Cas system during bacteriophage infection of

566 *Thermus thermophilus*. *Nucleic Acids Research*. <https://doi.org/10.1093/nar/gkaa685>

567 Benson, D. A., Cavanaugh, M., Clark, K., Karsch-Mizrachi, I., Ostell, J., Pruitt, K. D., & Sayers, E. W. (2018).

568 GenBank. *Nucleic Acids Research*. <https://doi.org/10.1093/nar/gkx1094>

569 Bernheim, A., Bikard, D., Touchon, M., & Rocha, E. P. C. (2020). Atypical organizations and epistatic interactions

570 of CRISPRs and cas clusters in genomes and their mobile genetic elements. *Nucleic Acids Research*.

- 571 <https://doi.org/10.1093/nar/gkz1091>
- 572 Bolotin, A., Quinquis, B., Sorokin, A., & Dusko Ehrlich, S. (2005). Clustered regularly interspaced short  
573 palindrome repeats (CRISPRs) have spacers of extrachromosomal origin. *Microbiology*.  
574 <https://doi.org/10.1099/mic.0.28048-0>
- 575 Brouns, S. J. J., Jore, M. M., Lundgren, M., Westra, E. R., Slijkhuis, R. J. H., Snijders, A. P. L., Dickman, M. J.,  
576 Makarova, K. S., Koonin, E. V., & van der Oost, J. (2008). Small CRISPR RNAs guide antiviral defense in  
577 prokaryotes. *Science (New York, N.Y.)*, 321(5891), 960–964. <https://doi.org/10.1126/science.1159689>
- 578 Callanan, J., Stockdale, S. R., Shkoporov, A., Draper, L. A., Ross, R. P., & Hill, C. (2020). Expansion of known  
579 ssRNA phage genomes: From tens to over a thousand. *Science Advances*.  
580 <https://doi.org/10.1126/sciadv.aay5981>
- 581 Chen, H., Mayer, A., & Balasubramanian, V. (2021). A scaling law in CRISPR repertoire sizes arises from  
582 avoidance of autoimmunity. *BioRxiv*, 2021.01.04.425308. <https://doi.org/10.1101/2021.01.04.425308>
- 583 Chen, I. M. A., Markowitz, V. M., Chu, K., Palaniappan, K., Szeto, E., Pillay, M., Ratner, A., Huang, J., Andersen,  
584 E., Huntemann, M., Varghese, N., Hadjithomas, M., Tennesen, K., Nielsen, T., Ivanova, N. N., & Kyrpides,  
585 N. C. (2017). IMG/M: Integrated genome and metagenome comparative data analysis system. *Nucleic  
586 Acids Research*. <https://doi.org/10.1093/nar/gkw929>
- 587 Clarke, R., Heler, R., MacDougall, M. S., Yeo, N. C., Chavez, A., Regan, M., Hanakahi, L., Church, G. M.,  
588 Marraffini, L. A., & Merrill, B. J. (2018). Enhanced Bacterial Immunity and Mammalian Genome Editing via  
589 RNA-Polymerase-Mediated Dislodging of Cas9 from Double-Strand DNA Breaks. *Molecular Cell*.  
590 <https://doi.org/10.1016/j.molcel.2018.06.005>
- 591 Cock, P. J. A., Antao, T., Chang, J. T., Chapman, B. A., Cox, C. J., Dalke, A., Friedberg, I., Hamelryck, T., Kauff, F.,  
592 Wilczynski, B., & De Hoon, M. J. L. (2009). Biopython: Freely available Python tools for computational  
593 molecular biology and bioinformatics. *Bioinformatics*. <https://doi.org/10.1093/bioinformatics/btp163>
- 594 Collias, D., & Beisel, C. L. (2021). CRISPR technologies and the search for the PAM-free nuclease. *Nature  
595 Communications*, 12(1), 555. <https://doi.org/10.1038/s41467-020-20633-y>
- 596 Crawley, A. B., Henriksen, E. D., Stout, E., Brandt, K., & Barrangou, R. (2018). Characterizing the activity of

- 597 abundant, diverse and active CRISPR-Cas systems in lactobacilli. *Scientific Reports*.
- 598 <https://doi.org/10.1038/s41598-018-29746-3>
- 599 Datsenko, K. A., Pougach, K., Tikhonov, A., Wanner, B. L., Severinov, K., & Semenova, E. (2012). Molecular  
600 memory of prior infections activates the CRISPR/Cas adaptive bacterial immunity system. *Nature*  
601 *Communications*. <https://doi.org/10.1038/ncomms1937>
- 602 Deng, L., Garrett, R. A., Shah, S. A., Peng, X., & She, Q. (2013). A novel interference mechanism by a type IIIB  
603 CRISPR-Cmr module in *Sulfolobus*. *Molecular Microbiology*. <https://doi.org/10.1111/mmi.12152>
- 604 Deveau, H., Barrangou, R., Garneau, J. E., Labonte, J., Fremaux, C., Boyaval, P., Romero, D. A., Horvath, P., &  
605 Moineau, S. (2008). Phage Response to CRISPR-Encoded Resistance in *Streptococcus thermophilus*.  
606 *Journal of Bacteriology*, *190*(4), 1390–1400. <https://doi.org/10.1128/JB.01412-07>
- 607 Elmore, J. R., Sheppard, N. F., Ramia, N., Deighan, T., Li, H., Terns, R. M., & Terns, M. P. (2016). Bipartite  
608 recognition of target RNAs activates DNA cleavage by the Type III-B CRISPR–Cas system. *Genes and*  
609 *Development*. <https://doi.org/10.1101/gad.272153.115>
- 610 Federhen, S. (2012). The NCBI Taxonomy database. *Nucleic Acids Research*.  
611 <https://doi.org/10.1093/nar/gkr1178>
- 612 Fineran, P. C., Gerritzen, M. J. H., Suarez-Diez, M., Kunne, T., Boekhorst, J., van Hijum, S. a. F. T., Staals, R. H. J.,  
613 & Brouns, S. J. J. (2014). Degenerate target sites mediate rapid primed CRISPR adaptation. *Proceedings of*  
614 *the National Academy of Sciences*, *111*(16), 1629–1638. <https://doi.org/10.1073/pnas.1400071111>
- 615 Fischer, S., Maier, L. K., Stoll, B., Brendel, J., Fischer, E., Pfeiffer, F., Dyall-Smith, M., & Marchfelder, A. (2012).  
616 An archaeal immune system can detect multiple protospacer adjacent motifs (PAMs) to target invader  
617 DNA. *Journal of Biological Chemistry*. <https://doi.org/10.1074/jbc.M112.377002>
- 618 Fu, L., Niu, B., Zhu, Z., Wu, S., & Li, W. (2012). CD-HIT: Accelerated for clustering the next-generation  
619 sequencing data. *Bioinformatics*. <https://doi.org/10.1093/bioinformatics/bts565>
- 620 Gasiunas, G., Young, J. K., Karvelis, T., Kazlauskas, D., Urbaitis, T., Jasnauskaite, M., Grusyte, M. M., Paulraj, S.,  
621 Wang, P. H., Hou, Z., Dooley, S. K., Cigan, M., Alarcon, C., Chilcoat, N. D., Bigelyte, G., Curcuru, J. L.,  
622 Mabuchi, M., Sun, Z., Fuchs, R. T., ... Siksny, V. (2020). A catalogue of biochemically diverse CRISPR-Cas9



- 623 orthologs. *Nature Communications*. <https://doi.org/10.1038/s41467-020-19344-1>
- 624 Gleditzsch, D., Pausch, P., Müller-Esparza, H., Özcan, A., Guo, X., Bange, G., & Randau, L. (2019). PAM  
625 identification by CRISPR-Cas effector complexes: diversified mechanisms and structures. *RNA Biology*,  
626 *16*(4), 504–517. <https://doi.org/10.1080/15476286.2018.1504546>
- 627 Hale, C. R., Duff, M. O., Graveley, B. R., Hale, C. R., Zhao, P., Olson, S., Duff, M. O., Graveley, B. R., Wells, L., &  
628 Terns, R. M. (2009). RNA-guided RNA cleavage by a CRISPR RNA- Cas protein complex RNA-Guided RNA  
629 Cleavage by a CRISPR RNA-Cas Protein Complex. *Cell*, *139*(5), 945–956.  
630 <https://doi.org/10.1016/j.cell.2009.07.040>
- 631 Hoikkala, V., Ravantti, J., Díez-Villaseñor, C., Tiirola, M., Conrad, R. A., McBride, M. J., Moineau, S., & Sundberg,  
632 L.-R. (2021). Cooperation between Different CRISPR-Cas Types Enables Adaptation in an RNA-Targeting  
633 System. *MBio*, *12*(2), e03338-20. <https://doi.org/10.1128/mBio.03338-20>
- 634 Hyatt, D., Chen, G. L., LoCascio, P. F., Land, M. L., Larimer, F. W., & Hauser, L. J. (2010). Prodigal: Prokaryotic  
635 gene recognition and translation initiation site identification. *BMC Bioinformatics*.  
636 <https://doi.org/10.1186/1471-2105-11-119>
- 637 Jackson, S. A., McKenzie, R. E., Fagerlund, R. D., Kieper, S. N., Fineran, P. C., & Brouns, S. J. J. (2017). CRISPR-Cas:  
638 Adapting to change. *Science*. <https://doi.org/10.1126/science.aal5056>
- 639 Johnson, K., Learn, B. A., Estrella, M. A., & Bailey, S. (2019). Target sequence requirements of a type III-B  
640 CRISPR-Cas immune system. *Journal of Biological Chemistry*, *294*(26), 10290–10299.  
641 <https://doi.org/10.1074/jbc.RA119.008728>
- 642 Jore, M. M., Lundgren, M., Van Duijn, E., Bultema, J. B., Westra, E. R., Waghmare, S. P., Wiedenheft, B., Pul, Ü.,  
643 Wurm, R., Wagner, R., Beijer, M. R., Barendregt, A., Zhou, K., Snijders, A. P. L., Dickman, M. J., Doudna, J.  
644 A., Boekema, E. J., Heck, A. J. R., Van Der Oost, J., & Brouns, S. J. J. (2011). Structural basis for CRISPR  
645 RNA-guided DNA recognition by Cascade. *Nature Structural and Molecular Biology*, *18*(5), 529–536.  
646 <https://doi.org/10.1038/nsmb.2019>
- 647 Kazlauskienė, M., Kostiuk, G., Venclovas, Č., Tamulaitis, G., & Siksnys, V. (2017). A cyclic oligonucleotide  
648 signaling pathway in type III CRISPR-Cas systems. *Science*, *357*(6351), 605–609.

- 649 <https://doi.org/10.1126/science.aao0100>
- 650 Krupovic, M., Makarova, K. S., Forterre, P., Prangishvili, D., & Koonin, E. V. (2014). Casposons: A new  
651 superfamily of self-synthesizing DNA transposons at the origin of prokaryotic CRISPR-Cas immunity. *BMC*  
652 *Biology*. <https://doi.org/10.1186/1741-7007-12-36>
- 653 Lange, S. J., Alkhnbashi, O. S., Rose, D., Will, S., & Backofen, R. (2013). CRISPRmap: An automated classification  
654 of repeat conservation in prokaryotic adaptive immune systems. *Nucleic Acids Research*.  
655 <https://doi.org/10.1093/nar/gkt606>
- 656 Leenay, R. T., & Beisel, C. L. (2017). Deciphering, Communicating, and Engineering the CRISPR PAM. In *Journal*  
657 *of Molecular Biology*. <https://doi.org/10.1016/j.jmb.2016.11.024>
- 658 Leenay, R. T., Maksimchuk, K. R., Slotkowski, R. A., Agrawal, R. N., Gomaa, A. A., Briner, A. E., Barrangou, R., &  
659 Beisel, C. L. (2016). Identifying and Visualizing Functional PAM Diversity across CRISPR-Cas Systems.  
660 *Molecular Cell*, *62*(1), 137–147. <https://doi.org/10.1016/j.molcel.2016.02.031>
- 661 Majumdar, S., Zhao, P., Pfister, N. T., Compton, M., Olson, S., Glover, C. V. C., Wells, L., Graveley, B. R., Terns, R.  
662 M., & Terns, M. P. (2015). Three CRISPR-Cas immune effector complexes coexist in *Pyrococcus furiosus*.  
663 *RNA (New York, N.Y.)*. <https://doi.org/10.1261/rna.049130.114>
- 664 Makarova, K. S., Haft, D. H., Barrangou, R., Brouns, S. J. J., Mojica, F. J. M., Wolf, Y. I., Yakunin, A. F., Oost, J. Van  
665 Der, & Koonin, E. V. (2011). Evolution and classification of the CRISPR–Cas systems. *Nature Publishing*  
666 *Group*, *9*(6), 467–477. <https://doi.org/10.1038/nrmicro2577>
- 667 Makarova, K. S., Wolf, Y. I., Alkhnbashi, O. S., Costa, F., Shah, S. A., Saunders, S. J., Barrangou, R., Brouns, S. J. J.,  
668 Charpentier, E., Haft, D. H., Horvath, P., Moineau, S., Mojica, F. J. M., Terns, R. M., Terns, M. P., White, M.  
669 F., Yakunin, A. F., Garrett, R. A., van der Oost, J., ... Koonin, E. V. (2015). An updated evolutionary  
670 classification of CRISPR–Cas systems. *Nature Reviews Microbiology*, *13*(11), 722–736.  
671 <https://doi.org/10.1038/nrmicro3569>
- 672 Makarova, K. S., Wolf, Y. I., Iranzo, J., Shmakov, S. A., Alkhnbashi, O. S., Brouns, S. J. J., Charpentier, E., Cheng,  
673 D., Haft, D. H., Horvath, P., Moineau, S., Mojica, F. J. M., Scott, D., Shah, S. A., Siksnys, V., Terns, M. P.,  
674 Venclovas, Č., White, M. F., Yakunin, A. F., ... Koonin, E. V. (2020). Evolutionary classification of CRISPR–

- 675 Cas systems: a burst of class 2 and derived variants. In *Nature Reviews Microbiology*.
- 676 <https://doi.org/10.1038/s41579-019-0299-x>
- 677 Malone, L. M., Warring, S. L., Jackson, S. A., Warnecke, C., Gardner, P. P., Gumy, L. F., & Fineran, P. C. (2020). A  
678 jumbo phage that forms a nucleus-like structure evades CRISPR–Cas DNA targeting but is vulnerable to  
679 type III RNA-based immunity. In *Nature Microbiology*. <https://doi.org/10.1038/s41564-019-0612-5>
- 680 Manica, A., Zebec, Z., Steinkellner, J., & Schleper, C. (2013). Unexpectedly broad target recognition of the  
681 CRISPR-mediated virus defence system in the archaeon *Sulfolobus solfataricus*. *Nucleic Acids Research*.  
682 <https://doi.org/10.1093/nar/gkt767>
- 683 Marraffini, L. A. (2015). CRISPR-Cas immunity in prokaryotes. *Nature*, *526*(7571), 55–61.  
684 <https://doi.org/10.1038/nature15386>
- 685 Marraffini, L. A., & Sontheimer, E. J. (2010). Self versus non-self discrimination during CRISPR RNA-directed  
686 immunity. *Nature*, *463*(7280), 568–571. <https://doi.org/10.1038/nature08703>
- 687 Mendoza, B. J., & Trinh, C. T. (2018). In Silico Processing of the Complete CRISPR-Cas Spacer Space for  
688 Identification of PAM Sequences. *Biotechnology Journal*. <https://doi.org/10.1002/biot.201700595>
- 689 Mendoza, S. D., Nieweglowska, E. S., Govindarajan, S., Leon, L. M., Berry, J. D., Tiwari, A., Chaikerasitak, V.,  
690 Pogliano, J., Agard, D. A., & Bondy-Denomy, J. (2020). A bacteriophage nucleus-like compartment shields  
691 DNA from CRISPR nucleases. *Nature*, *577*(7789), 244–248. <https://doi.org/10.1038/s41586-019-1786-y>
- 692 Mitchell, A. L., Almeida, A., Beracochea, M., Boland, M., Burgin, J., Cochrane, G., Crusoe, M. R., Kale, V., Potter,  
693 S. C., Richardson, L. J., Sakharova, E., Scheremetjew, M., Korobeynikov, A., Shlemov, A., Kunyavskaya, O.,  
694 Lapidus, A., & Finn, R. D. (2020). MGnify: the microbiome analysis resource in 2020. *Nucleic Acids  
695 Research*, *48*(D1), D570–D578. <https://doi.org/10.1093/nar/gkz1035>
- 696 Mojica, F. J. M., Díez-Villaseñor, C., García-Martínez, J., & Almendros, C. (2009). Short motif sequences  
697 determine the targets of the prokaryotic CRISPR defence system. *Microbiology*, *155*(3), 733–740.  
698 <https://doi.org/10.1099/mic.0.023960-0>
- 699 Musharova, O., Sitnik, V., Vlot, M., Savitskaya, E., Datsenko, K. A., Krivoy, A., Fedorov, I., Semenova, E., Brouns,  
700 S. J. J., & Severinov, K. (2019). Systematic analysis of Type I-E *Escherichia coli* CRISPR-Cas PAM sequences

- 701 ability to promote interference and primed adaptation. *Molecular Microbiology*.
- 702 <https://doi.org/10.1111/mmi.14237>
- 703 Nicholson, T. J., Jackson, S. A., Croft, B. I., Staals, R. H. J., Fineran, P. C., & Brown, C. M. (2019). Bioinformatic  
704 evidence of widespread priming in type I and II CRISPR-Cas systems. *RNA Biology*, *16*(4), 566–576.  
705 <https://doi.org/10.1080/15476286.2018.1509662>
- 706 Niewoehner, O., Garcia-Doval, C., Rostøl, J. T., Berk, C., Schwede, F., Bigler, L., Hall, J., Marraffini, L. A., & Jinek,  
707 M. (2017). Type III CRISPR-Cas systems produce cyclic oligoadenylate second messengers. *Nature*,  
708 *548*(7669), 543–548. <https://doi.org/10.1038/nature23467>
- 709 Nobrega, F., Walinga, H., Dutilh, B., & Brouns, S. (2020). Prophages are associated with extensive, tolerated  
710 CRISPR-Cas auto-immunity. *BioRxiv*, 2020.03.02.973784. <https://doi.org/10.1101/2020.03.02.973784>
- 711 Paez-Espino, D., Roux, S., Chen, I. M. A., Palaniappan, K., Ratner, A., Chu, K., Huntemann, M., Reddy, T. B. K.,  
712 Pons, J. C., Llabrés, M., Eloë-Fadrosch, E. A., Ivanova, N. N., & Kyrpides, N. C. (2019). IMG/VR v.2.0: An  
713 integrated data management and analysis system for cultivated and environmental viral genomes.  
714 *Nucleic Acids Research*. <https://doi.org/10.1093/nar/gky1127>
- 715 Pasolli, E., Asnicar, F., Manara, S., Zolfo, M., Karcher, N., Armanini, F., Beghini, F., Manghi, P., Tett, A., Ghensi,  
716 P., Collado, M. C., Rice, B. L., DuLong, C., Morgan, X. C., Golden, C. D., Quince, C., Huttenhower, C., &  
717 Segata, N. (2019). Extensive Unexplored Human Microbiome Diversity Revealed by Over 150,000  
718 Genomes from Metagenomes Spanning Age, Geography, and Lifestyle. *Cell*, *176*(3), 649-662.e20.  
719 <https://doi.org/10.1016/j.cell.2019.01.001>
- 720 Pawluk, A., Davidson, A. R., & Maxwell, K. L. (2017). *Anti-CRISPR: discovery, mechanism and function*.  
721 <https://doi.org/10.1038/nrmicro.2017.120>
- 722 Peterson, J., Garges, S., Giovanni, M., McInnes, P., Wang, L., Schloss, J. A., Bonazzi, V., McEwen, J. E.,  
723 Wetterstrand, K. A., Deal, C., Baker, C. C., Di Francesco, V., Howcroft, T. K., Karp, R. W., Lunsford, R. D.,  
724 Wellington, C. R., Belachew, T., Wright, M., Giblin, C., ... Guyer, M. (2009). The NIH Human Microbiome  
725 Project. *Genome Research*. <https://doi.org/10.1101/gr.096651.109>
- 726 Pinilla-Redondo, R., Mayo-Muñoz, D., Russel, J., Garrett, R. A., Randau, L., Sørensen, S. J., & Shah, S. A. (2020).

- 727 Type IV CRISPR-Cas systems are highly diverse and involved in competition between plasmids. *Nucleic*  
728 *Acids Research*. <https://doi.org/10.1093/nar/gkz1197>
- 729 Pourcel, C., Touchon, M., Villeriot, N., Vernadet, J. P., Couvin, D., Toffano-Nioche, C., & Vergnaud, G. (2020).  
730 CRISPRCasdb a successor of CRISPRdb containing CRISPR arrays and cas genes from complete genome  
731 sequences, and tools to download and query lists of repeats and spacers. *Nucleic Acids Research*, 48(D1),  
732 D535–D544. <https://doi.org/10.1093/nar/gkz915>
- 733 Pruitt, K. D., Tatusova, T., & Maglott, D. R. (2005). NCBI Reference Sequence (RefSeq): A curated non-redundant  
734 sequence database of genomes, transcripts and proteins. *Nucleic Acids Research*.  
735 <https://doi.org/10.1093/nar/gki025>
- 736 Sayers, E. W., Barrett, T., Benson, D. A., Bryant, S. H., Canese, K., Chetvernin, V., Church, D. M., Dicuccio, M.,  
737 Edgar, R., Federhen, S., Feolo, M., Geer, L. Y., Helmberg, W., Kapustin, Y., Landsman, D., Lipman, D. J.,  
738 Madden, T. L., Maglott, D. R., Miller, V., ... Ye, J. (2009). Database resources of the National Center for  
739 Biotechnology Information. *Nucleic Acids Research*. <https://doi.org/10.1093/nar/gkn741>
- 740 Schneider, T. D., & Stephens, R. M. (1990). Sequence logos: A new way to display consensus sequences. *Nucleic*  
741 *Acids Research*. <https://doi.org/10.1093/nar/18.20.6097>
- 742 Shah, S. A., Erdmann, S., Mojica, F. J. M., & Garrett, R. A. (2013). Protospacer recognition motifs: Mixed  
743 identities and functional diversity. In *RNA Biology*. <https://doi.org/10.4161/rna.23764>
- 744 Shmakov, S. A., Sitnik, V., Makarova, K. S., Wolf, Y. I., Severinov, K. V., & Koonin, E. V. (2017). The CRISPR spacer  
745 space is dominated by sequences from species-specific mobilomes. *MBio*.  
746 <https://doi.org/10.1128/mBio.01397-17>
- 747 Silas, S., Lucas-Elio, P., Jackson, S. A., Aroca-Crevillén, A., Hansen, L. L., Fineran, P. C., Fire, A. Z., & Sánchez-  
748 Amat, A. (2017). Type III CRISPR-Cas systems can provide redundancy to counteract viral escape from  
749 type I systems. *ELife*. <https://doi.org/10.7554/eLife.27601>
- 750 Silas, S., Mohr, G., Sidote, D. J., Markham, L. M., Sanchez-Amat, A., Bhaya, D., Lambowitz, A. M., & Fire, A. Z.  
751 (2016). Direct CRISPR spacer acquisition from RNA by a natural reverse transcriptase-Cas1 fusion protein.  
752 *Science*, 351(6276). <https://doi.org/10.1126/science.aad4234>

- 753 Soto-Perez, P., Bisanz, J. E., Berry, J. D., Lam, K. N., Bondy-Denomy, J., & Turnbaugh, P. J. (2019). CRISPR-Cas  
754 System of a Prevalent Human Gut Bacterium Reveals Hyper-targeting against Phages in a Human Virome  
755 Catalog. *Cell Host & Microbe*, 26(3), 325-335.e5. <https://doi.org/10.1016/j.chom.2019.08.008>
- 756 Strutt, S. C., Torrez, R. M., Kaya, E., Negrete, O. A., & Doudna, J. A. (2018). RNA-dependent RNA targeting by  
757 CRISPR-Cas9. *ELife*. <https://doi.org/10.7554/eLife.32724>
- 758 Swarts, D. C., Mosterd, C., van Passel, M. W. J., & Brouns, S. J. J. (2012). CRISPR Interference Directs Strand  
759 Specific Spacer Acquisition. *PLOS ONE*, 7(4), e35888. <https://doi.org/10.1371/journal.pone.0035888>
- 760 Vale, P. F., Lafforgue, G., Gatchitch, F., Gardan, R., Moineau, S., & Gandon, S. (2015). Costs of CRISPR-Cas-  
761 mediated resistance in *Streptococcus thermophilus*. *Proceedings of the Royal Society B: Biological*  
762 *Sciences*. <https://doi.org/10.1098/rspb.2015.1270>
- 763 Vink, J. N. A., Martens, K. J. A., Vlot, M., McKenzie, R. E., Almendros, C., Estrada Bonilla, B., Brocken, D. J. W.,  
764 Hohlbein, J., & Brouns, S. J. J. (2020). Direct Visualization of Native CRISPR Target Search in Live Bacteria  
765 Reveals Cascade DNA Surveillance Mechanism. *Molecular Cell*, 77(1), 39-50.e10.  
766 <https://doi.org/10.1016/j.molcel.2019.10.021>
- 767 Walton, R. T., Christie, K. A., Whittaker, M. N., & Kleinstiver, B. P. (2020). Unconstrained genome targeting with  
768 near-PAMless engineered CRISPR-Cas9 variants. *Science*, 368(6488), 290 LP – 296.  
769 <https://doi.org/10.1126/science.aba8853>
- 770 Walton, R. T., Hsu, J. Y., Joung, J. K., & Kleinstiver, B. P. (2021). Scalable characterization of the PAM  
771 requirements of CRISPR-Cas enzymes using HT-PAMDA. *Nature Protocols*.  
772 <https://doi.org/10.1038/s41596-020-00465-2>
- 773 Westra, E. R., Buckling, A., & Fineran, P. C. (2014). CRISPR-Cas systems: Beyond adaptive immunity. *Nature*  
774 *Reviews Microbiology*. <https://doi.org/10.1038/nrmicro3241>
- 775 Westra, E. R., Semenova, E., Datsenko, K. A., Jackson, R. N., Wiedenheft, B., Severinov, K., & Brouns, S. J. J.  
776 (2013). Type I-E CRISPR-Cas Systems Discriminate Target from Non-Target DNA through Base Pairing-  
777 Independent PAM Recognition. *PLoS Genetics*, 9(9), e1003742.  
778 <https://doi.org/10.1371/journal.pgen.1003742>

- 779 Wolf, Y. I., Silas, S., Wang, Y., Wu, S., Bocek, M., Kazlauskas, D., Krupovic, M., Fire, A., Dolja, V. V., & Koonin, E.  
780 V. (2020). Doubling of the known set of RNA viruses by metagenomic analysis of an aquatic virome.  
781 *Nature Microbiology*. <https://doi.org/10.1038/s41564-020-0755-4>
- 782 Xue, C., Zhu, Y., Zhang, X., Shin, Y. K., & Sashital, D. G. (2017). Real-Time Observation of Target Search by the  
783 CRISPR Surveillance Complex Cascade. *Cell Reports*, 21(13), 3717–3727.  
784 <https://doi.org/10.1016/j.celrep.2017.11.110>
- 785

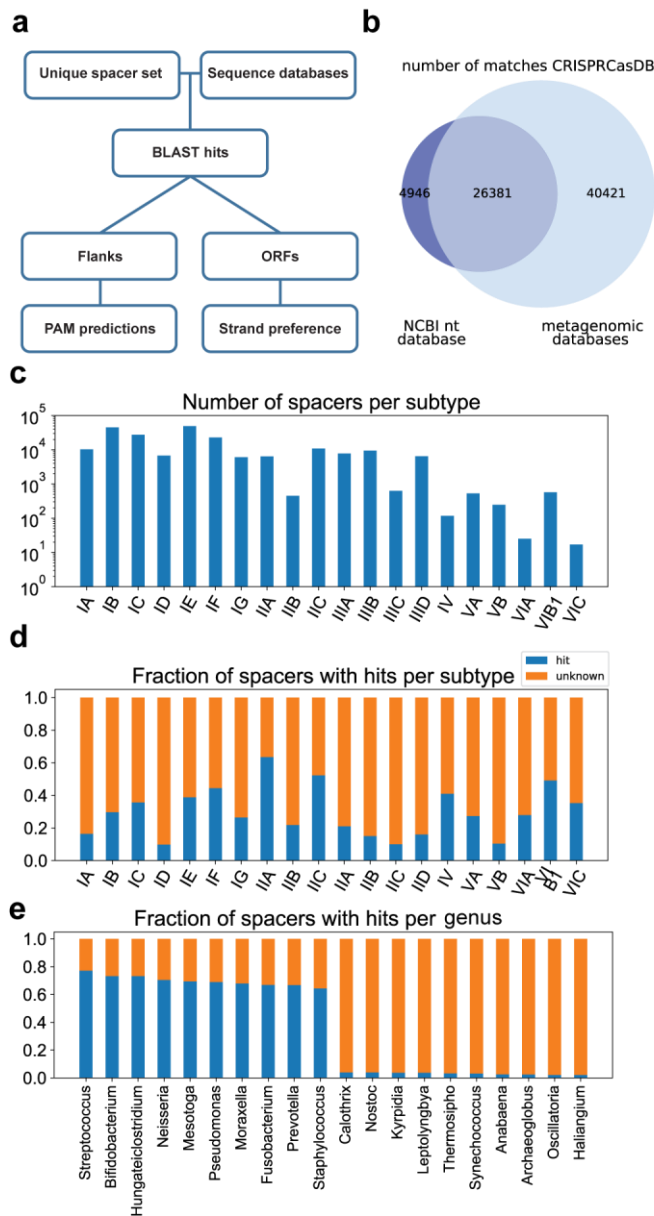

786

787 **Figure 1. Spacer targets found with BLAST.** (A) Computational pipeline for finding spacer targets. Targets of  
 788 72 099 spacers were found using blastn and filtered based on the fraction of spacer nucleotides matching a target  
 789 sequence (See methods). (B) Venn diagram of spacers with matches in the NCBI nucleotide database versus  
 790 metagenomic databases (C) Number of spacers per subtype. The subtype of a spacer was predicted based on  
 791 similarity of the repeat sequence to repeats with a known subtype (See methods). (D) Fraction of spacers with hits  
 792 per subtype. (E) Fraction of spacers with hits for the ten genera with the highest and ten genera with the lowest  
 793 fraction of hits. Only genera with at least 500 spacers are shown.



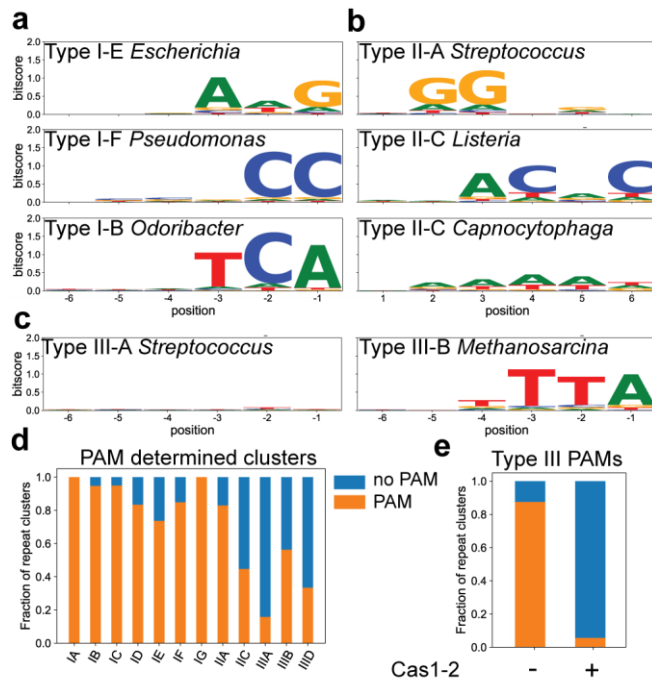

794

795 **Figure 2. PAM determination of repeat clusters.** (A) Sequence logos of upstream flank of hits to spacers from  
796 Type I repeat clusters. Sequence logos of protospacer flanking regions per repeat cluster. Y-axes show information  
797 content per nucleotide position. Label includes subtype of the repeat cluster and a representative genus in which  
798 this repeat cluster is found. (B) Same as (A) but for downstream flanks of spacers from Type II repeat clusters. (C)  
799 Same as (A) but for upstream flanks from Type III repeat clusters. (D) Frequency of PAM determined repeat  
800 clusters with more than 25 hits. Nucleotide positions were considered part of PAM with a bitscore of at least 0.4  
801 and 10 times above the median bitscore of the 23 nucleotides surrounding the hits. PAM size was at least 2  
802 nucleotides. (E) Frequency of PAM determined repeat clusters for Type III systems that contain Cas1-2 vs Type  
803 III systems that lack Cas1-2.

804

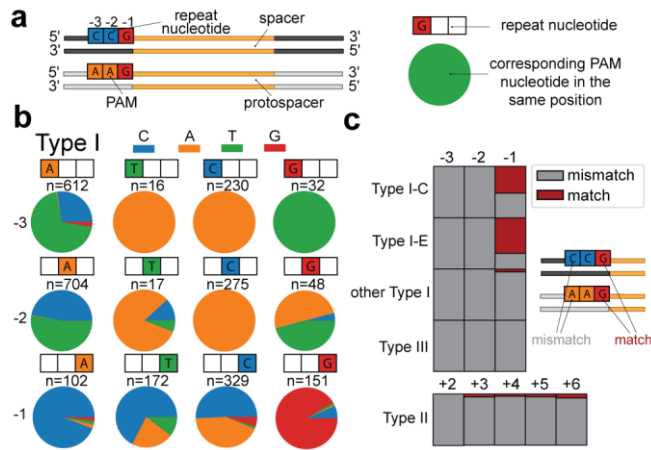

805

806 **Figure 3. Relationship between repeat and PAM sequence.** (A) Schematic of the analysis of PAM and repeat  
 807 sequence. The nucleotide identity of the PAM in each position is compared to the nucleotide of the repeat. (B).  
 808 PAM nucleotide frequency for Type I repeats. For each given repeat nucleotide position (indicated with coloured  
 809 boxes) the PAM nucleotide (pie chart) for each unique PAM-repeat combination of our database. Number of  
 810 occurrence is indicated above the pie chart (n). (C). The frequency of matches (red) and mismatches (grey) between  
 811 the PAM and the corresponding repeat nucleotide for each position in relationship to the spacer. For Type II, the  
 812 positions are compared on the other side of the spacer.

813

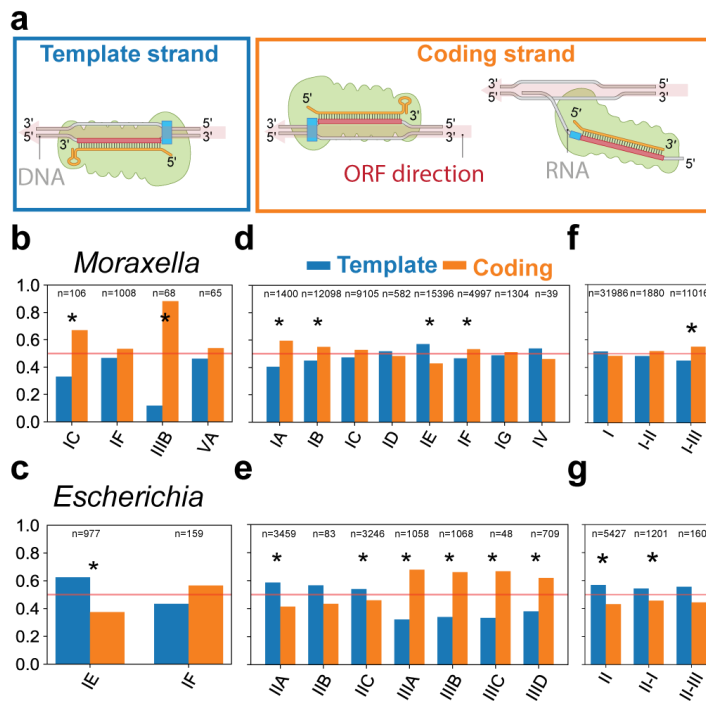

814

815 **Figure 4. Template and coding strand targeting of spacers.** (A) Schematic representation of a spacer targeting

816 the template strand and a spacer targeting the coding strand inside an ORF. Spacers targeting the coding strand are

817 also able to base pair with and target transcribed RNA. (B) Fraction of *Escherichia* spacers targeting template

818 (blue) and coding (orange) strand by subtype. (C) Fraction of *Moraxella* spacers targeting template and coding

819 strand by subtype. (D) Fraction of spacers targeting template and coding strand for Type I and Type IV subtypes.

820 (E) Fraction of spacers targeting template and coding strand for Type II and Type III subtypes. (F) Fraction of

821 spacers targeting template and coding strand for Type I. Spacers are grouped based on which other type of Cas

822 effector genes are present in the genome. (G) Same as (F) but for Type II spacers. Significance of strand bias is

823 calculated with a binomial test and a p-value < 0.01 is indicated with an asterisk.

824

825

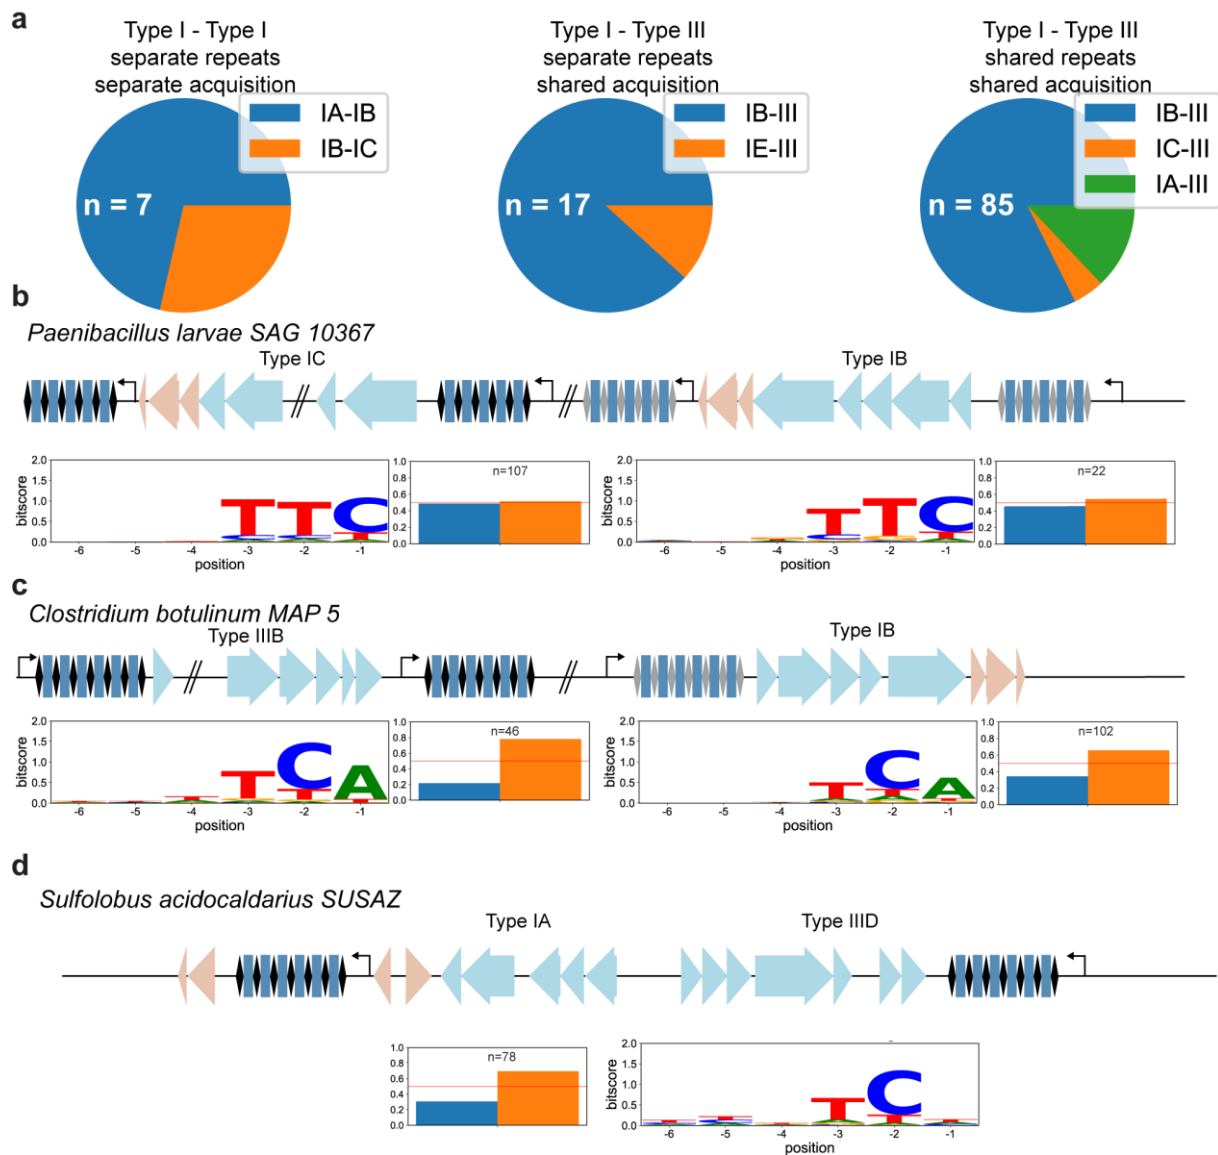

826

827 **Figure 5. Different organisations of subtypes containing compatible spacer sequences.** (A) Pie chart of  
 828 frequency of genomes each category of organisation, based on the subtype combination involved. Total number  
 829 of genomes for which this category was found (n) is noted in each chart (n). (B-D) Genome representations of  
 830 examples for the different organisation categories, (b) Type I-Type I compatibility, (c) Type I- Type III  
 831 compatibility (different repeat sequences), (d) Type I- Type III compatibility (same repeat sequences). Genes  
 832 involved in interference (blue) and adaptation (red) are shown for the different subtypes within the genome. PAM  
 833 logo and strand bias of each associated repeat cluster is depicted below the genomic representations.

834

835 **Supplementary figures**

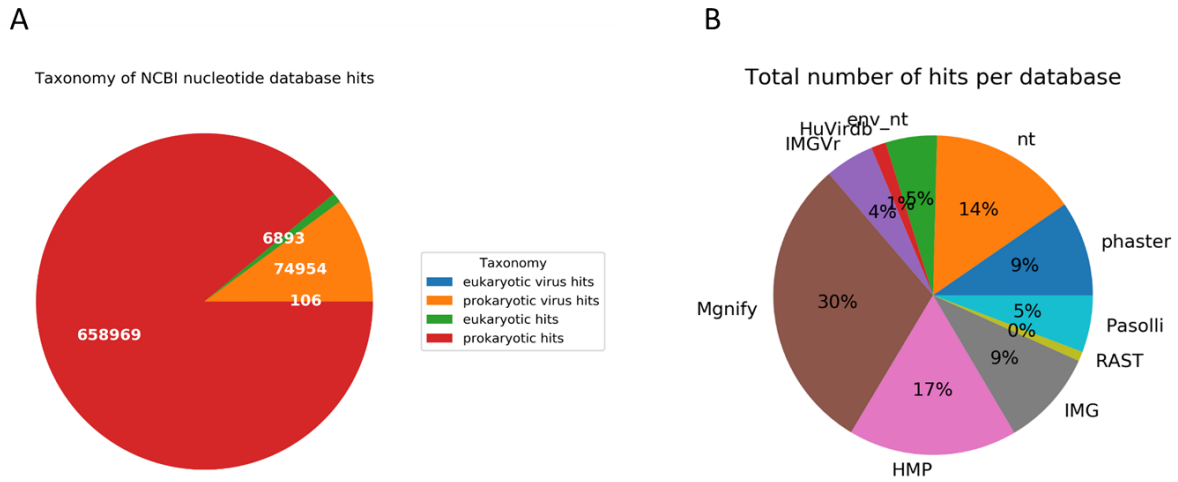

836

837 **Supplementary figure 1. Taxonomy of spacer targets and number of found targets per database.** (A) The  
838 taxonomy of targeted sequences of the NCBI nucleotide database was obtained from the NCBI taxonomy database.  
839 For hits in viral sequences, the taxonomy of known hosts was used to label the virus as a eukaryotic or prokaryotic  
840 virus. (B) The contribution of each database to the total number of hits after filtering. All databases were accessed  
841 in February 2020.

842

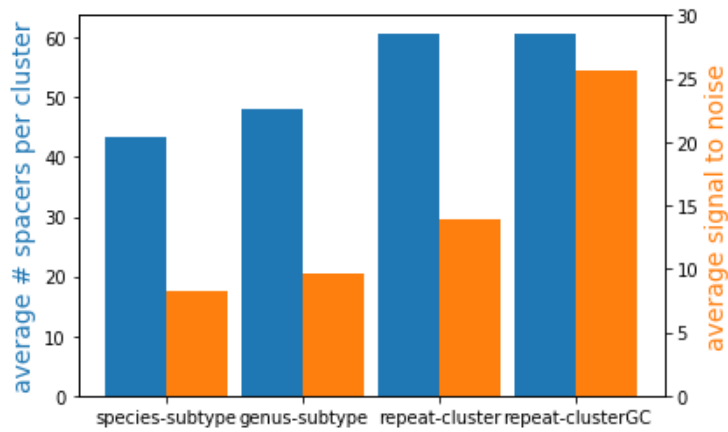

843

844 **Supplementary figure 2 Average number and signal to noise ratio of clustered hits.** Different clustering  
845 methods were compared for their average number of unique hits (blue) and average signal to noise ratio (orange).  
846 Signal to noise ratio was calculated by dividing the average information content of the two top positions in the  
847 flank (potential PAM nucleotides) by the median information content in sequence logos generated from flanks of  
848 hits. The clustering categories is based on whether spacers come from same species and subtype (species-subtype),  
849 from same genus and subtype (genus-subtype), from clusters of repeat sequences with 90% identity (repeat-cluster)  
850 or clusters of repeat sequences with 90% identity and additionally compensation for GC-content of spacers within  
851 the cluster (see Materials and Methods, repeat-clusterGC).

852

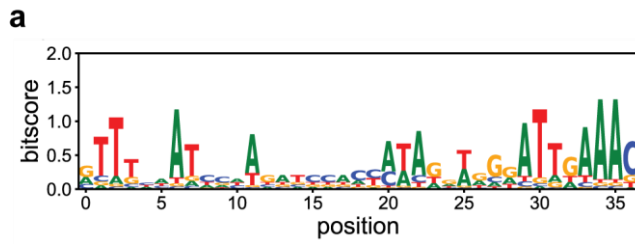

853

854 **Supplementary figure 3. Sequence logo Type III repeats.** ClustalW alignment of Type III repeats for which

855 orientation was determined based on presence of PAM ( $n = 21$  unique repeats). The 3'end of the repeat, which is

856 the 5' handle of the transcribed crRNA, has a conserved motif (ATTGAAAC).

857

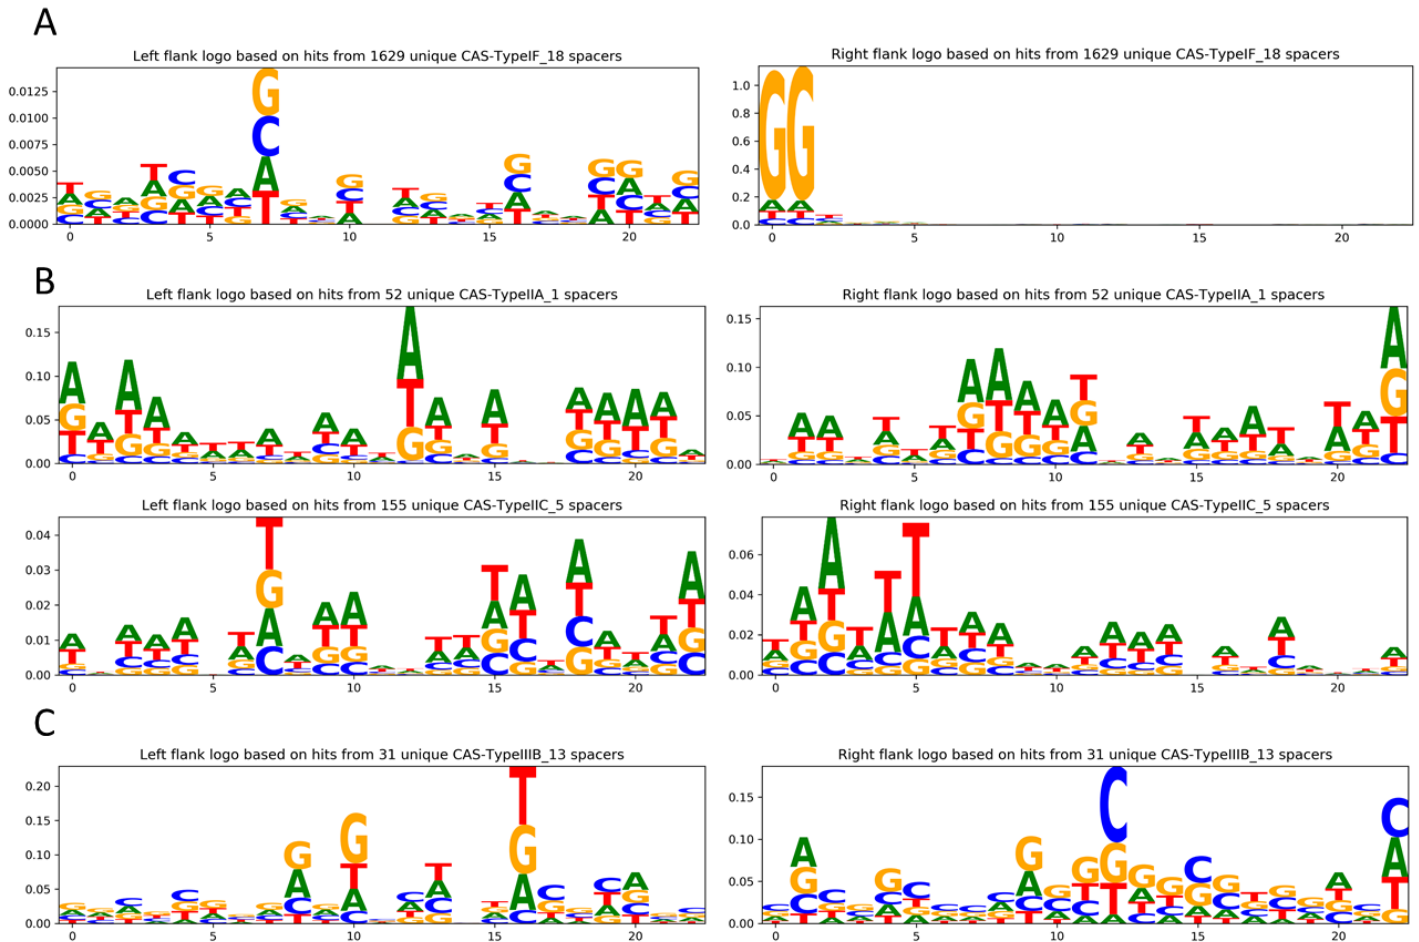

858 **Supplementary figure 4. Sequence logos of protospacer flanking regions per repeat cluster.** (A) The sequence  
859 logo of subtype IF repeat cluster is based on flanks of 1629 unique spacers. The reverse complement of the subtype  
860 IF CC PAM is found, due to incorrect orientation of spacers from the repeat cluster. (B) The sequence logos of  
861 subtype IIA and IIC repeat clusters. No positions with conserved nucleotides are visible, despite the high number  
862 of unique spacers for each cluster (52, 155 respectively). (C) The sequence logo of a subtype IIIB repeat cluster  
863 showing no positions with conserved nucleotides based on flanks of 31 unique spacers.

864



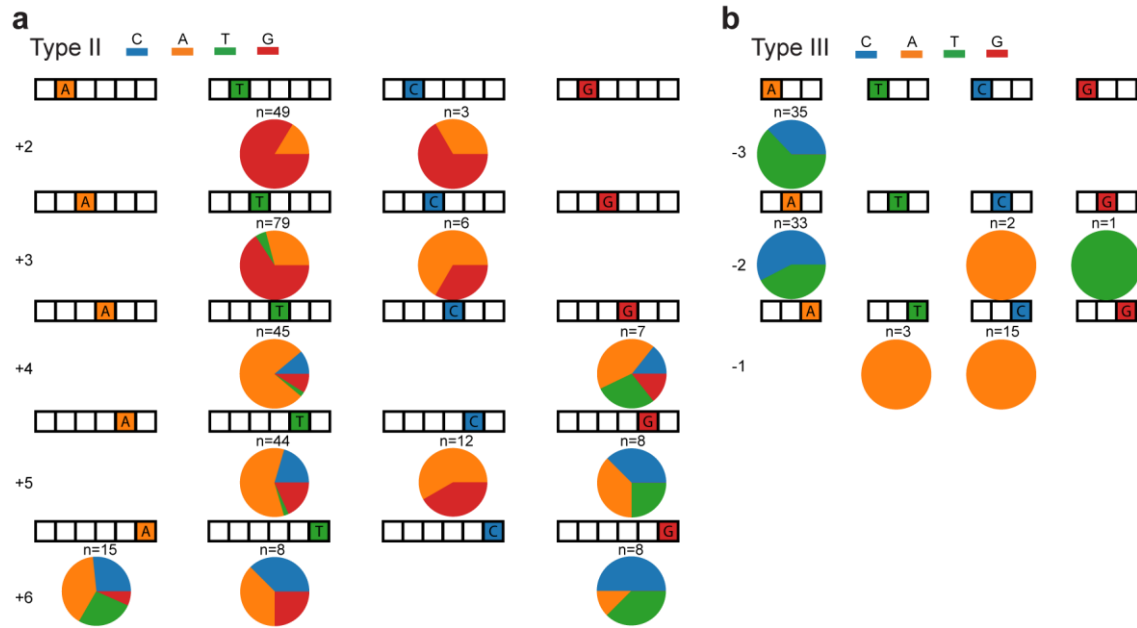

865

866 **Relationship between repeat and PAM sequence of Type II and Type III systems.** Same as Figure 3B except

867 for Type II (A) and Type III (B) systems.

868

| Subtype    | PAM | Genus                         | Subtype    | PAM                      | Genus                  | Subtype              | PAM                            | Genus                  |
|------------|-----|-------------------------------|------------|--------------------------|------------------------|----------------------|--------------------------------|------------------------|
| <b>I-A</b> | ATG | <i>Leptospira</i>             | <b>I-B</b> | TTTA                     | <i>Petrimonas</i>      | <b>I-E</b>           | AAG                            | <i>Geobacter</i>       |
|            | CCN | <i>Acidianus</i>              |            | TTG                      | <i>Thermobacillus</i>  |                      | AAN                            | <i>Klebsiella</i>      |
|            | TTA | <i>Thermodesulfobacterium</i> | <b>I-C</b> | CTN                      | <i>Anaerobutyricum</i> |                      | AAT                            | <i>Lactobacillus</i>   |
|            | TCN | <i>Sulfurisphaera</i>         |            | CCN                      | <i>Porphyromonas</i>   |                      | AAA                            | <i>Kosakonia</i>       |
|            | ATN | <i>Aminobacterium</i>         |            | CTT                      | <i>Ruminococcus</i>    |                      | AC                             | <i>Corynebacterium</i> |
| <b>I-B</b> | CCA | <i>Moorella</i>               | TTC        | <i>Geobacillus</i>       | AG                     | <i>Xenorhabdus</i>   |                                |                        |
|            | CCN | <i>Clostridium</i>            | TTN        | <i>Acidovorax</i>        | AWG                    | <i>Escherichia</i>   |                                |                        |
|            | CCT | <i>Ureibacillus</i>           | TTT        | <i>Lachnoclostridium</i> | <b>I-F</b>             | ACC                  | <i>Aeromonas</i>               |                        |
|            | TAC | <i>Halorubrum</i>             | <b>I-D</b> | GCN                      |                        | <i>Haloquadratum</i> | CC                             | <i>Pseudomonas</i>     |
|            | TCA | <i>Campylobacter</i>          |            | GGTG                     | <i>Halorubrum</i>      | CCA                  | <i>Pseudomonas</i>             |                        |
|            | TCN | <i>Campylobacter</i>          |            | GTN                      | <i>Methanotrix</i>     | <b>I-G</b>           | TAC                            | <i>Rothia</i>          |
|            | TTA | <i>Methanosarcina</i>         | GTT        | <i>Microcystis</i>       | TAN                    |                      | <i>Propionibacterium</i>       |                        |
|            | TTC | <i>Halobacterium</i>          | GTG        | <i>Methanospirillum</i>  | TTN                    |                      | <i>Pseudopropionibacterium</i> |                        |
|            | TTN | <i>Novibacillus</i>           | <b>I-E</b> | AAC                      | <i>Bifidobacterium</i> | AAN                  | <i>Acidipropionibacterium</i>  |                        |
|            |     |                               |            |                          | TTC                    | <i>Rhodothermus</i>  |                                |                        |

869

870 **Supplementary Table 1. Unique Type I PAM sequences.** Table of all unique Type I PAMs found for the

871 different subtypes and representative genera that contain the repeat cluster for which each PAM was determined.
